# Supplementary material for: MicroRNA Expression Profiles of Whole Blood in Lung Adenocarcinoma
Source: PubMed Central journal article supplement (PMC3460960; doi:10.1371/journal.pone.0046045), 2012-09-28
Supplement: pone.0046045.s005.pdf [file pone.0046045.s005.pdf]

**Table S1**Case-specific demographic and clinico-pathologic details<sup>a</sup>

| ID | Histology of lung tumor | Age (y) | Sex | History of smoking | Current smoker | Duration of last smoking cessation | Pathologic stage of lung cancer | Year of surgery | Days before surgery that blood was collection for blood tests, or year of blood collection | WBC (x1000/ $\mu$ l) | Hgb (g/dl) | Platelets (x1000/ $\mu$ l) | Note                             |
|----|-------------------------|---------|-----|--------------------|----------------|------------------------------------|---------------------------------|-----------------|--------------------------------------------------------------------------------------------|----------------------|------------|----------------------------|----------------------------------|
| 1  | AC                      | 76      | F   | Yes                | Yes            |                                    | T1N2M0                          | 2007            | 0                                                                                          | 5.7                  | 13.5       | 299                        |                                  |
| 2  | AC                      | 73      | M   | Yes                | No             | 22 y                               | T2N0M0                          | 2007            | 24                                                                                         | 7                    | 15.8       | 177                        |                                  |
| 3  | AC                      | 69      | M   | Yes                | No             | 3 y                                | T1N0M0                          | 2007            | 26                                                                                         | 9.3                  | 14.9       | 376                        |                                  |
| 4  | AC                      | 68      | M   | Yes                | No             | 16 y                               | T1N2M0                          | 2007            | 0                                                                                          | 8.6                  | 13.6       | 156                        | Post-operative blood collection  |
| 5  | AC                      | 58      | M   | Yes                | No             | 1 y                                | T2N2M0                          | 2007            | 7                                                                                          | 3.4                  | 12         | 55                         |                                  |
| 6  | AC                      | 72      | F   | Yes                | No             | 1 y                                | T2N1M0                          | 2007            | 24                                                                                         | 5.6                  | 14         | 328                        | Has synchronous stage IA lung AC |
| 7  | AC                      | 83      | M   | Yes                | No             | 31 y                               | T1N0M0                          | 2008            | 26                                                                                         | 4.7                  | 13.2       | 221                        |                                  |
| 8  | AC                      | 77      | M   | Yes                | No             | 29 y                               | T1N0M0                          | 2008            | 12                                                                                         | 6                    | 13.8       | 214                        |                                  |
| 10 | AC                      | 72      | F   | No                 | No             |                                    | T1N0M0                          | 2009            | 22                                                                                         | 8.8                  | 13.7       | 266                        |                                  |
| 11 | AC                      | 68      | F   | No                 | No             |                                    | T2N0M0                          | 2009            | 31                                                                                         | 5.2                  | 14.3       | 238                        |                                  |
| 12 | AC                      | 75      | F   | Yes                | No             | 1 y                                |                                 | 2009            | 5                                                                                          | 8                    | 13.1       | 277                        | Has multifocal disease           |
| 13 | AC                      | 85      | M   | Yes                | No             | 41 y                               |                                 | 2009            | 0                                                                                          | 4.5                  | 11         | 97                         | Has small lymphocytic leukemia   |
| 14 | AC                      | 72      | M   | Yes                | No             | 11 y                               | T2N1M0                          | 2009            | 13                                                                                         | 8.9                  | 13.4       | 206                        |                                  |
| 16 | AC                      | 64      | F   | Yes                | Yes            |                                    | T1N0M0                          | 2009            | 20                                                                                         | 8.9                  | 13.2       | 380                        |                                  |
| 17 | AC                      | 69      | F   | Yes                | No             | 45 y                               | T1N1M0                          | 2009            | 13                                                                                         | 7.3                  | 14         | 275                        |                                  |
| 18 | AC                      | 50      | F   | Yes                | Yes            |                                    | T1N0M0                          | 2009            | 20                                                                                         | 5.3                  | 13.3       | 239                        |                                  |
| 20 | AC                      | 72      | M   | Yes                | No             | 25 y                               | T2N0M0                          | 2009            | 13                                                                                         | 5.9                  | 14.3       | 125                        |                                  |
| 21 | AC                      | 68      | F   | Yes                | No             | 38 y                               | T1N0M0                          | 2009            | 13                                                                                         | 6.2                  | 13.9       | 250                        |                                  |
| 22 | AC                      | 63      | M   | Yes                | No             | 20 y                               | T1N0M0                          | 2009            | 20                                                                                         | 6.6                  | 10.1       | 248                        |                                  |
| 23 | AC                      | 78      | M   | Yes                | No             | 41 y                               | T4N0M0                          | 2009            | 2                                                                                          | 8.3                  | 12.7       | 203                        |                                  |
| 24 | AC                      | 73      | M   | Yes                | No             | 33 y                               | T4N2M0                          | 2009            | 18                                                                                         | 8.9                  | 16.6       | 218                        |                                  |
| 25 | AC                      | 68      | F   | Yes                | No             | 14 y                               | T1N0M0                          | 2010            | 371                                                                                        | 4.9                  | 12.6       | 297                        |                                  |
| 26 | Granuloma               | 61      | F   | No                 | No             |                                    |                                 | 2007            | 12                                                                                         | 5.8                  | 14.4       | 249                        |                                  |
| 27 | Granuloma               | 45      | M   | Yes                | No             | 3 w                                |                                 | 2009            | 16                                                                                         | 5.1                  | 15.6       | 269                        |                                  |
| 28 | Normal                  | 74      | F   | Yes                | No             | 2 y                                |                                 | 2009            | 26                                                                                         | 7.4                  | 11.4       | 306                        |                                  |
| 29 | Hamartoma               | 36      | F   | Yes                | No             | 20 y                               |                                 | 2009            | 6                                                                                          | 7.1                  | 12.8       | 223                        |                                  |
| 30 | Amyloid                 | 69      | M   | Yes                | No             | 22 y                               |                                 | 2009            | 1                                                                                          | 8.3                  | 13.2       | 216                        |                                  |
| 31 | Granuloma               | 63      | F   | No                 | No             |                                    |                                 | 2009            | 15                                                                                         | 6.8                  | 14.6       | 308                        |                                  |
| 32 | Granuloma               | 69      | M   | Yes                | No             | 5 y                                |                                 | 2009            | 7                                                                                          | 8.6                  | 15.3       | 213                        |                                  |

|    |           |    |   |     |     |      |      |      |      |      |     |                                                                                 |
|----|-----------|----|---|-----|-----|------|------|------|------|------|-----|---------------------------------------------------------------------------------|
| 33 | Granuloma | 72 | M | Yes | No  | 30 y | 2009 | 13   | 4.7  | 13.4 | 234 |                                                                                 |
| 35 | Granuloma | 51 | F | Yes | No  | 1 m  | 2010 | 17   | 8.3  | 13.1 | 189 |                                                                                 |
| 36 | Granuloma | 64 | F | No  | No  |      | 2010 | 24   | 5.8  | 13.8 | 210 |                                                                                 |
| 37 |           | 58 | F | Yes | No  | 3 m  |      | 2009 | 10.6 | 13.2 | 354 | No lung nodule; blood collected >90 d before surgery                            |
| 38 |           | 59 | F | No  | No  |      |      | 2007 | 6.1  | 13.6 | 277 | Lung nodule radiologically-stable for 2 y; blood collected >90 d before surgery |
| 39 |           | 55 | F | Yes | No  | 20 y |      |      |      |      |     | No lung nodule                                                                  |
| 40 |           | 65 | M | Yes | No  | 10 y |      |      |      |      |     | No lung nodule                                                                  |
| 41 |           | 54 | M | Yes | No  | 3 m  |      | 2005 | 8.2  | 16   | 382 | No lung nodule; blood collected >90 d before surgery                            |
| 42 |           | 60 | M | Yes | No  | 20 y |      | 2008 | 7.5  | 12.6 | 354 | No lung nodule; blood collected >90 d before surgery                            |
| 43 |           | 54 | M | Yes | Yes |      |      |      |      |      |     | No lung nodule                                                                  |
| 44 |           | 61 | F | Yes | No  | 42 y |      |      |      |      |     | No lung nodule                                                                  |
| 45 |           | 74 | M | Yes | No  | 15 y |      |      |      |      |     | No lung nodule                                                                  |
| 46 |           | 64 | M | Yes | No  | 8 y  |      | 2007 | 16.4 | 11.6 | 351 | No lung nodule; blood collected >90 d before surgery                            |
| 47 |           | 55 | M | Yes | Yes |      |      |      |      |      |     | No lung nodule                                                                  |
| 48 |           | 62 | M | Yes | No  | 20 y |      | 2010 | 7.3  | 13.9 | 188 | No lung nodule; blood collected >90 d before surgery                            |
| 49 |           | 53 | M | Yes | Yes |      |      | 2010 | 7.4  | 11.7 | 154 | No lung nodule                                                                  |

<sup>a</sup>Individuals with IDs <26 belong to the case cohort, and others belong to the control cohort. Cells for unavailable data or unapplicable variables are left blank. AC, adenocarcinoma; d, day; F, female; Hgb, hemoglobin; m, month; M, male; WBC, white blood cell; y, year. All individuals are of white race.
