# Supplementary material for: MicroRNA Expression Profiles of Whole Blood in Lung Adenocarcinoma
Source: PubMed Central journal article supplement (PMC3460960; doi:10.1371/journal.pone.0046045), 2012-09-28
Supplement: pone.0046045.s006.pdf [file pone.0046045.s006.pdf]

**Table S2**Descriptive statistics of microarray signal values for all expressed microRNAs and non-microRNA small RNAs<sup>a</sup>

| RNA                    | Cases (n = 22)                    |         | Controls (n = 23)                |         | Fold-change | Moderated t-statistic | Moderated F-statistic | Adjusted P |
|------------------------|-----------------------------------|---------|----------------------------------|---------|-------------|-----------------------|-----------------------|------------|
|                        | Mean (range; standard deviation)  | Median  | Mean (range; standard deviation) | Median  |             |                       |                       |            |
| <b>MicroRNAs</b>       |                                   |         |                                  |         |             |                       |                       |            |
| <i>let-7a</i>          | 1724.49 (720.25-4564.11; 1048.68) | 1363.65 | 2244.31 (974.25-4202.21; 914.23) | 1986.04 | 0.77        | -1.79                 | 3.19                  | 0.17512    |
| <i>let-7b</i>          | 306.04 (143.41-1147.12; 256.53)   | 205.05  | 359.4 (136.86-741.44; 162.58)    | 341.25  | 0.85        | -0.84                 | 0.71                  | 0.51844    |
| <i>let-7b*</i>         | 50.55 (34.19-62.75; 8.19)         | 52.40   | 50.88 (30.08-64.85; 8.14)        | 51.94   | 0.99        | -0.13                 | 0.02                  | 0.92430    |
| <i>let-7c</i>          | 55.37 (34.91-194.17; 36.04)       | 44.73   | 56.66 (35.3-98.51; 13.93)        | 55.01   | 0.98        | -0.16                 | 0.03                  | 0.91062    |
| <i>let-7d</i>          | 469.02 (195.76-1419.2; 296.72)    | 369.01  | 638.75 (276.2-1129.54; 237.52)   | 658.44  | 0.73        | -2.14                 | 4.57                  | 0.10641    |
| <i>let-7d*</i>         | 81.06 (54.15-137.47; 19.52)       | 78.20   | 78.06 (65.44-125; 12.75)         | 75.47   | 1.04        | 0.62                  | 0.38                  | 0.64058    |
| <i>let-7e</i>          | 71.03 (55.54-123.53; 14.76)       | 68.04   | 69.3 (50.75-96.04; 10.64)        | 69.49   | 1.02        | 0.45                  | 0.21                  | 0.73257    |
| <b><i>let-7f</i></b>   | 172.56 (68.18-475.14; 96.41)      | 154.40  | 312.48 (57.72-677.46; 150.58)    | 331.53  | 0.55        | -3.72                 | 13.83                 | 0.00723    |
| <b><i>let-7g</i></b>   | 1446.88 (584.58-3361.89; 703.15)  | 1237.61 | 2089.45 (912.3-3982.66; 848.14)  | 1888.30 | 0.69        | -2.78                 | 7.72                  | 0.03706    |
| <i>let-7i</i>          | 472.98 (158.83-1539.37; 365.86)   | 339.13  | 707.53 (267.4-1721.13; 402.96)   | 619.39  | 0.67        | -2.06                 | 4.23                  | 0.11617    |
| <i>let-7i*</i>         | 29.19 (20.78-44.75; 6.56)         | 26.36   | 34.8 (22.98-55.91; 8.92)         | 35.30   | 0.84        | -2.40                 | 5.77                  | 0.07058    |
| <i>miR-1</i>           | 45.26 (31.12-72.03; 10.26)        | 42.65   | 39.56 (28.57-65.66; 8.67)        | 37.15   | 1.14        | 2.02                  | 4.09                  | 0.12296    |
| <i>miR-100</i>         | 41.52 (23.06-61.61; 11.53)        | 39.72   | 41.56 (24.06-71.99; 11.69)       | 40.23   | 1.00        | -0.01                 | <0.01                 | 0.99121    |
| <i>miR-101</i>         | 129.15 (50.65-276.71; 68.2)       | 103.96  | 186.76 (73.36-439.94; 81.46)     | 172.17  | 0.69        | -2.58                 | 6.68                  | 0.05066    |
| <b><i>miR-103</i></b>  | 434.09 (196.42-830.87; 181.77)    | 376.72  | 620.84 (189.64-990.97; 230.98)   | 614.98  | 0.70        | -3.03                 | 9.15                  | 0.02518    |
| <i>miR-103-2*</i>      | 71.49 (50.07-121.92; 18.83)       | 65.50   | 71.29 (32.29-99.89; 16.46)       | 74.64   | 1.00        | 0.04                  | <0.01                 | 0.97550    |
| <i>miR-106a</i>        | 1409.83 (398.99-3814.5; 916.07)   | 1010.05 | 2034.3 (503.75-4879.82; 1027.56) | 2016.76 | 0.69        | -2.16                 | 4.68                  | 0.10175    |
| <i>miR-106b</i>        | 938.82 (285.53-1904.85; 516.56)   | 662.68  | 1293.39 (407.56-3124.43; 614.46) | 1171.02 | 0.73        | -2.10                 | 4.43                  | 0.11003    |
| <i>miR-106b*</i>       | 210.96 (71.05-397.55; 84.88)      | 189.32  | 280.13 (75.52-494.16; 108.32)    | 297.92  | 0.75        | -2.39                 | 5.73                  | 0.07083    |
| <b><i>miR-107</i></b>  | 360 (140.73-709.75; 165.9)        | 311.01  | 521.81 (162.81-948.43; 206.41)   | 569.90  | 0.69        | -2.91                 | 8.47                  | 0.03034    |
| <i>miR-10a</i>         | 51.68 (35.72-69.6; 9.77)          | 51.83   | 48.94 (31.36-65.83; 8.43)        | 47.63   | 1.06        | 1.01                  | 1.03                  | 0.44729    |
| <i>miR-10b</i>         | 39.39 (28.29-57.78; 7.6)          | 37.52   | 35.93 (25.43-52.68; 6.88)        | 36.63   | 1.10        | 1.60                  | 2.58                  | 0.21963    |
| <i>miR-1184</i>        | 80.03 (34.02-208.98; 39.99)       | 69.51   | 89.94 (50.04-152.74; 29.16)      | 87.97   | 0.89        | -0.96                 | 0.92                  | 0.46181    |
| <i>miR-1207-3p</i>     | 64.67 (55.12-71; 4.55)            | 64.93   | 61.89 (51.82-88.36; 7.26)        | 61.47   | 1.04        | 1.53                  | 2.35                  | 0.24165    |
| <i>miR-122</i>         | 51.93 (35.35-88.09; 12.53)        | 48.30   | 45.71 (32.23-80.32; 11.75)       | 42.40   | 1.14        | 1.73                  | 2.99                  | 0.18753    |
| <i>miR-1227</i>        | 48.95 (43.74-53.4; 2.53)          | 48.47   | 46.95 (41.25-65.25; 4.53)        | 45.99   | 1.04        | 1.80                  | 3.26                  | 0.17253    |
| <i>miR-1228*</i>       | 33.2 (29.94-35.66; 1.54)          | 33.30   | 32.66 (28.71-36.62; 1.78)        | 32.28   | 1.02        | 1.01                  | 1.03                  | 0.44729    |
| <i>miR-1236</i>        | 57.65 (47.23-79.55; 6.89)         | 56.65   | 58.22 (48.82-68.43; 5.63)        | 57.54   | 0.99        | -0.30                 | 0.09                  | 0.83345    |
| <i>miR-124</i>         | 46.04 (30.8-93.1; 13.67)          | 41.48   | 40.24 (27.93-78.03; 11.33)       | 38.00   | 1.14        | 1.56                  | 2.44                  | 0.23636    |
| <b><i>miR-1246</i></b> | 859.35 (470.08-1147.21; 183.81)   | 859.03  | 662.12 (422.13-1152.96; 160.66)  | 655.42  | 1.30        | 3.86                  | 14.93                 | 0.00553    |
| <b><i>miR-1247</i></b> | 32.82 (29.59-35.41; 1.57)         | 32.56   | 34.5 (30.21-40.38; 2.28)         | 34.47   | 0.95        | -2.73                 | 7.45                  | 0.04119    |
| <b><i>miR-1248</i></b> | 34.28 (23.15-52.3; 7.52)          | 33.08   | 28.06 (21.25-33.27; 3.13)        | 27.89   | 1.22        | 3.65                  | 13.32                 | 0.00836    |

|                          |                                  |         |                                  |         |      |       |       |         |
|--------------------------|----------------------------------|---------|----------------------------------|---------|------|-------|-------|---------|
| <i>miR-1249</i>          | 106.85 (85.52-118.36; 8)         | 108.53  | 108.69 (92.24-125.49; 9.19)      | 108.76  | 0.98 | -0.72 | 0.51  | 0.58292 |
| <i>miR-1250</i>          | 33.71 (29.89-36.43; 1.56)        | 34.10   | 33.58 (29.49-55.55; 5.05)        | 32.19   | 1.00 | 0.11  | 0.01  | 0.92789 |
| <b><i>miR-1255a</i></b>  | 85.44 (72.95-97.34; 6.56)        | 86.18   | 78.73 (64.55-85.35; 5.72)        | 80.29   | 1.09 | 3.67  | 13.44 | 0.00820 |
| <i>miR-125a-5p</i>       | 123.47 (91.7-176.05; 23.31)      | 121.00  | 116.31 (83.25-182.94; 25.32)     | 109.17  | 1.06 | 0.99  | 0.99  | 0.45169 |
| <i>miR-125b</i>          | 185.92 (66.38-428.96; 100.03)    | 173.28  | 153.3 (68.9-343.94; 71.64)       | 148.68  | 1.21 | 1.27  | 1.61  | 0.33743 |
| <i>miR-126</i>           | 357.93 (146.67-1040.09; 208.28)  | 278.30  | 509.01 (183.55-1017.08; 228.16)  | 456.72  | 0.70 | -2.33 | 5.44  | 0.07800 |
| <b><i>miR-126*</i></b>   | 38.98 (32.42-55.04; 4.46)        | 38.11   | 46.18 (36.71-67.77; 7.67)        | 44.04   | 0.84 | -3.83 | 14.70 | 0.00564 |
| <i>miR-1261</i>          | 78.76 (42.89-156.15; 32.08)      | 69.04   | 96.65 (63.19-165.61; 24.86)      | 93.10   | 0.81 | -2.11 | 4.45  | 0.10958 |
| <i>miR-1264</i>          | 89.96 (49.01-168.35; 24.02)      | 84.46   | 83.42 (50.77-133.44; 22.23)      | 84.61   | 1.08 | 0.96  | 0.91  | 0.46295 |
| <i>miR-1265</i>          | 35.73 (30.42-41.04; 2.37)        | 35.22   | 34.97 (29.42-41.58; 3.05)        | 34.79   | 1.02 | 0.91  | 0.82  | 0.48782 |
| <b><i>miR-1268</i></b>   | 38.81 (35.32-44.04; 2.13)        | 38.30   | 35.67 (32.94-41.73; 1.96)        | 35.44   | 1.09 | 4.93  | 24.29 | 0.00063 |
| <i>miR-1274a</i>         | 50.42 (39.54-67.83; 7.6)         | 49.29   | 45.64 (37.35-62.69; 6.03)        | 43.89   | 1.10 | 2.35  | 5.51  | 0.07578 |
| <i>miR-1274b</i>         | 34.48 (29.39-37.19; 2.18)        | 34.90   | 33.68 (29.92-35.75; 1.78)        | 34.35   | 1.02 | 1.30  | 1.70  | 0.32519 |
| <i>miR-1275</i>          | 50.24 (38.34-70.91; 8.18)        | 49.05   | 47.53 (29.34-62.62; 9.26)        | 46.34   | 1.06 | 1.04  | 1.08  | 0.43720 |
| <i>miR-1279</i>          | 32.42 (28.95-34.65; 1.45)        | 32.69   | 31.49 (29.81-33.72; 1.04)        | 31.16   | 1.03 | 2.18  | 4.77  | 0.09804 |
| <i>miR-128</i>           | 67.69 (54.62-96.81; 11.13)       | 64.85   | 71.94 (47.98-87.48; 10.42)       | 71.40   | 0.94 | -1.33 | 1.77  | 0.31338 |
| <b><i>miR-1280</i></b>   | 201.19 (113.84-314.92; 60.28)    | 196.40  | 155.33 (97.27-220.03; 35.33)     | 156.33  | 1.30 | 3.15  | 9.94  | 0.02040 |
| <i>miR-1281</i>          | 69.81 (60.53-79.15; 4.35)        | 70.09   | 64.46 (55.92-96.27; 10.13)       | 62.12   | 1.08 | 2.29  | 5.25  | 0.08416 |
| <b><i>miR-1284</i></b>   | 38.12 (34.8-47; 2.71)            | 38.23   | 43.43 (38.9-49.49; 2.85)         | 43.48   | 0.88 | -6.26 | 39.20 | 0.00002 |
| <i>miR-1285</i>          | 54.93 (29.46-80.13; 13.14)       | 53.72   | 59.29 (33.28-90.15; 13.04)       | 59.25   | 0.93 | -1.12 | 1.26  | 0.39965 |
| <i>miR-129-5p</i>        | 283.68 (117.62-733.73; 156.99)   | 247.69  | 321.18 (180.28-513.17; 89.58)    | 326.41  | 0.88 | -1.00 | 0.99  | 0.45160 |
| <i>miR-129*</i>          | 43.21 (31.21-64.25; 7.04)        | 41.33   | 44.95 (33.44-54.01; 5.75)        | 45.50   | 0.96 | -0.91 | 0.83  | 0.48782 |
| <b><i>miR-1290</i></b>   | 171.55 (107.34-298.72; 50.99)    | 158.79  | 128.19 (91.04-218.49; 32.76)     | 120.01  | 1.34 | 3.43  | 11.78 | 0.01280 |
| <b><i>miR-1297</i></b>   | 157.84 (93.03-353.69; 57.39)     | 146.54  | 218.44 (68.98-417.83; 89.55)     | 195.78  | 0.72 | -2.71 | 7.33  | 0.04245 |
| <i>miR-1299</i>          | 61.68 (48.2-71.09; 5.43)         | 62.03   | 57.96 (43.19-68.21; 5.8)         | 57.13   | 1.06 | 2.22  | 4.92  | 0.09291 |
| <i>miR-1301</i>          | 32.7 (28.99-36.5; 2.18)          | 32.61   | 34.4 (28.19-41.45; 2.75)         | 34.07   | 0.95 | -2.23 | 4.97  | 0.09158 |
| <i>miR-1304</i>          | 38.36 (32.93-45.32; 2.72)        | 38.11   | 38.26 (33.65-42.14; 2.17)        | 38.75   | 1.00 | 0.13  | 0.02  | 0.92430 |
| <b><i>miR-130a</i></b>   | 247.32 (144.38-432; 88.18)       | 226.91  | 328.87 (169.99-518.97; 101.64)   | 293.32  | 0.75 | -2.89 | 8.35  | 0.03129 |
| <b><i>miR-130b</i></b>   | 61.75 (41.49-93.76; 16.88)       | 54.83   | 81.8 (38.13-131; 23.46)          | 82.87   | 0.75 | -3.30 | 10.88 | 0.01639 |
| <i>miR-130b*</i>         | 32.86 (28.33-37.09; 1.9)         | 33.01   | 33.43 (26.87-36.97; 2.49)        | 34.42   | 0.98 | -0.84 | 0.70  | 0.52195 |
| <i>miR-1321</i>          | 33.09 (29.49-37.42; 2.52)        | 33.30   | 32.4 (26.67-35.39; 2.1)          | 32.65   | 1.02 | 0.97  | 0.94  | 0.46135 |
| <i>miR-1323</i>          | 31.04 (23.76-42.66; 4.71)        | 31.03   | 29.13 (22.88-36.89; 4.09)        | 28.62   | 1.07 | 1.45  | 2.10  | 0.26887 |
| <i>miR-133a</i>          | 34.19 (23.67-60.6; 8.68)         | 32.96   | 30.92 (21.77-51.07; 7.29)        | 29.17   | 1.11 | 1.38  | 1.89  | 0.29310 |
| <i>miR-133b</i>          | 42.35 (29.44-70.8; 10.02)        | 40.33   | 37 (23.14-63.4; 10.43)           | 34.89   | 1.14 | 1.76  | 3.10  | 0.18095 |
| <i>miR-135a</i>          | 36.79 (31.55-44.38; 3.36)        | 36.00   | 35.83 (29.88-41.18; 3)           | 35.10   | 1.03 | 1.00  | 1.01  | 0.45039 |
| <b><i>miR-138-1*</i></b> | 52.33 (40.24-61.55; 5.44)        | 51.70   | 47.9 (38.84-57.94; 4.95)         | 49.03   | 1.09 | 2.86  | 8.15  | 0.03217 |
| <i>miR-140-3p</i>        | 1657.25 (716.94-2873.36; 662.44) | 1501.73 | 1753.58 (692.32-2690.82; 452.46) | 1699.03 | 0.95 | -0.58 | 0.33  | 0.66343 |
| <i>miR-141</i>           | 43.84 (30.81-60.92; 8.46)        | 43.05   | 39.29 (29.92-61.31; 7.72)        | 39.22   | 1.12 | 1.89  | 3.57  | 0.15210 |
| <i>miR-142-3p</i>        | 242.76 (86.96-706.94; 133.48)    | 208.08  | 205.54 (116.65-405.93; 71.95)    | 186.34  | 1.18 | 1.18  | 1.39  | 0.37332 |
| <i>miR-142-5p</i>        | 244.49 (83.09-460.39; 104.77)    | 258.56  | 281.32 (59.41-514.17; 95.49)     | 263.26  | 0.87 | -1.24 | 1.54  | 0.34983 |
| <i>miR-143</i>           | 59.73 (37.42-96.28; 13.55)       | 57.51   | 52.33 (29.78-75.36; 13.07)       | 52.84   | 1.14 | 1.88  | 3.52  | 0.15583 |
| <i>miR-143*</i>          | 33.55 (30.25-36.61; 1.91)        | 33.33   | 32.2 (27.6-37.03; 2.01)          | 32.26   | 1.04 | 2.19  | 4.81  | 0.09638 |
| <i>miR-144</i>           | 145.27 (40.29-347.28; 84.76)     | 130.56  | 200.57 (57.36-377.16; 84.77)     | 181.98  | 0.72 | -2.20 | 4.85  | 0.09511 |

|                    |                                     |         |                                     |          |      |       |       |         |
|--------------------|-------------------------------------|---------|-------------------------------------|----------|------|-------|-------|---------|
| <b>miR-144*</b>    | 143.57 (46.7-295.85; 72.96)         | 145.66  | 267.88 (47.73-517.8; 119.29)        | 265.76   | 0.54 | -4.22 | 17.83 | 0.00259 |
| <i>miR-145</i>     | 63.65 (41.61-95.91; 14.98)          | 58.81   | 56.33 (37.45-87.42; 12.88)          | 56.16    | 1.13 | 1.77  | 3.14  | 0.17999 |
| <i>miR-1469</i>    | 58.97 (44.19-81.82; 10.26)          | 58.16   | 58.66 (48.2-79.2; 7.45)             | 57.50    | 1.01 | 0.12  | 0.01  | 0.92628 |
| <b>miR-146a</b>    | 38.29 (28.6-51.29; 7.18)            | 36.06   | 45.58 (30.76-61.31; 8.85)           | 47.77    | 0.84 | -3.04 | 9.21  | 0.02494 |
| <i>miR-146b-3p</i> | 40.56 (37.63-44.23; 1.85)           | 40.40   | 41.26 (36.21-46.36; 2.89)           | 41.76    | 0.98 | -0.93 | 0.87  | 0.47544 |
| <i>miR-146b-5p</i> | 77.89 (58.08-119.51; 15.1)          | 74.84   | 84.33 (57.54-118.32; 13.54)         | 83.36    | 0.92 | -1.52 | 2.30  | 0.24627 |
| <i>miR-148a</i>    | 39.47 (29.14-52.78; 7.4)            | 38.14   | 43.31 (30.19-67.51; 9.28)           | 42.63    | 0.91 | -1.54 | 2.36  | 0.24108 |
| <i>miR-148b</i>    | 263.41 (96.03-567.52; 113.34)       | 231.73  | 269.69 (96.59-519.93; 92.35)        | 254.25   | 0.98 | -0.21 | 0.04  | 0.88123 |
| <i>miR-149*</i>    | 90.94 (61.9-140; 18.29)             | 93.77   | 100.14 (78.36-164.44; 19.28)        | 95.28    | 0.91 | -1.65 | 2.73  | 0.20600 |
| <i>miR-150</i>     | 735.29 (280.28-1464.34; 313.36)     | 650.89  | 803.25 (230.31-1299.92; 279.54)     | 805.43   | 0.92 | -0.77 | 0.60  | 0.55262 |
| <i>miR-151-3p</i>  | 90.5 (59.4-168.52; 28.65)           | 86.14   | 93.54 (40.3-200.16; 30.14)          | 90.27    | 0.97 | -0.35 | 0.12  | 0.79773 |
| <i>miR-151-5p</i>  | 400.24 (226.62-648.17; 119.05)      | 378.48  | 406.39 (171.5-713.97; 121.26)       | 395.05   | 0.98 | -0.17 | 0.03  | 0.90478 |
| <i>miR-152</i>     | 43.84 (34.82-51.15; 4.5)            | 44.10   | 42.3 (33.21-49.49; 4.23)            | 42.23    | 1.04 | 1.18  | 1.38  | 0.37332 |
| <i>miR-155</i>     | 39.32 (33.4-51.97; 3.93)            | 38.49   | 40.2 (29.33-46.21; 4.14)            | 41.23    | 0.98 | -0.72 | 0.52  | 0.58033 |
| <b>miR-15a</b>     | 1067.1 (340.91-2264.86; 500.02)     | 926.59  | 1899.57 (342.45-3870.18; 859.99)    | 1754.90  | 0.56 | -3.97 | 15.79 | 0.00485 |
| <i>miR-15b</i>     | 5590.55 (2390.21-9314.28; 1631.47)  | 5449.72 | 6019.54 (2574.88-9330.56; 1614.39)  | 6022.98  | 0.93 | -0.89 | 0.80  | 0.49652 |
| <i>miR-15b*</i>    | 33.4 (28.36-44.85; 3.99)            | 32.47   | 32.67 (26.32-38.49; 3.2)            | 32.96    | 1.02 | 0.67  | 0.45  | 0.61074 |
| <i>miR-16</i>      | 9350.83 (5532-15791.68; 3088.31)    | 8363.37 | 12106.1 (3688.55-18634.11; 4135.14) | 11851.02 | 0.77 | -2.54 | 6.46  | 0.05538 |
| <b>miR-16-2*</b>   | 52.16 (33.35-100.89; 19.86)         | 46.53   | 80.97 (31.06-148.04; 30.92)         | 77.93    | 0.64 | -3.72 | 13.87 | 0.00723 |
| <b>miR-17</b>      | 604.37 (252.59-1550.46; 343.17)     | 482.30  | 975.14 (277.42-2185.08; 443.34)     | 949.66   | 0.62 | -3.15 | 9.91  | 0.02040 |
| <i>miR-17*</i>     | 68.17 (20.71-161.52; 40.51)         | 59.20   | 91.04 (25.25-230.66; 50.71)         | 87.40    | 0.75 | -1.68 | 2.82  | 0.20052 |
| <b>miR-181a</b>    | 53.14 (31.48-99; 20.27)             | 47.48   | 76.88 (36.28-154.59; 31.38)         | 72.12    | 0.69 | -3.02 | 9.11  | 0.02518 |
| <i>miR-181a-2*</i> | 32.53 (21.65-47.53; 7.81)           | 29.76   | 35.18 (20.88-48.68; 7.25)           | 36.21    | 0.92 | -1.18 | 1.40  | 0.37332 |
| <i>miR-182</i>     | 748.88 (430.36-1229.35; 200.08)     | 735.12  | 902.32 (295.83-1902.8; 405.28)      | 815.33   | 0.83 | -1.61 | 2.59  | 0.21913 |
| <i>miR-1827</i>    | 213.44 (155.58-436.62; 66.36)       | 189.74  | 240.91 (159.7-362.15; 61.51)        | 227.54   | 0.89 | -1.45 | 2.10  | 0.26887 |
| <i>miR-183</i>     | 119.68 (40.28-242.14; 49.38)        | 115.06  | 154.67 (51.98-367.62; 74.16)        | 146.40   | 0.77 | -1.87 | 3.49  | 0.15787 |
| <i>miR-183*</i>    | 50.02 (36.15-61.65; 5.83)           | 49.18   | 52.36 (40.23-83.81; 9.45)           | 50.56    | 0.96 | -1.00 | 0.99  | 0.45160 |
| <i>miR-185</i>     | 1942.79 (787.89-5496.49; 1022.05)   | 1622.81 | 2373.4 (672.84-5393.38; 1062.43)    | 2105.79  | 0.82 | -1.39 | 1.94  | 0.28649 |
| <i>miR-185*</i>    | 241.41 (98.14-620.84; 139.76)       | 212.41  | 292.11 (144.08-506.45; 92.98)       | 277.21   | 0.83 | -1.45 | 2.10  | 0.26887 |
| <i>miR-186</i>     | 115.21 (69.66-255.04; 42.45)        | 102.10  | 136.31 (47.39-219.81; 34.91)        | 133.33   | 0.85 | -1.84 | 3.37  | 0.16334 |
| <i>miR-187*</i>    | 34.63 (29.31-39.69; 3.49)           | 34.62   | 33.26 (27.47-44.58; 4.01)           | 32.95    | 1.04 | 1.21  | 1.46  | 0.36312 |
| <b>miR-18a</b>     | 103.44 (35.59-242.25; 62.86)        | 75.79   | 175.58 (37.45-477.68; 100.54)       | 160.15   | 0.59 | -2.89 | 8.36  | 0.03129 |
| <i>miR-18a*</i>    | 202.6 (99.22-376.27; 58.98)         | 201.69  | 223.23 (57.16-406.03; 74.66)        | 223.81   | 0.91 | -1.03 | 1.07  | 0.43916 |
| <b>miR-18b</b>     | 44.08 (20.02-108.5; 24.7)           | 34.60   | 69.15 (20.79-181.32; 38.45)         | 62.24    | 0.64 | -2.61 | 6.79  | 0.04986 |
| <b>miR-18b*</b>    | 31.21 (27.51-36.64; 2.4)            | 31.10   | 37.26 (27.7-55.93; 6.15)            | 37.18    | 0.84 | -4.29 | 18.43 | 0.00219 |
| <i>miR-1908</i>    | 543.57 (240.09-1054.62; 213.26)     | 482.58  | 609.99 (314.34-1020.3; 175.86)      | 571.93   | 0.89 | -1.15 | 1.32  | 0.38507 |
| <b>miR-190b</b>    | 35.22 (32.94-37.72; 1.39)           | 35.32   | 32.61 (30.68-34.92; 1.06)           | 32.54    | 1.08 | 6.25  | 39.04 | 0.00002 |
| <i>miR-191</i>     | 8469.29 (5040.96-11244.11; 1765.16) | 8332.68 | 9594.15 (5347.3-14383.94; 2061.03)  | 9701.00  | 0.88 | -1.98 | 3.90  | 0.13207 |
| <i>miR-1913</i>    | 51.42 (43.36-55.63; 2.72)           | 51.63   | 52.33 (41.31-59.04; 4.21)           | 53.20    | 0.98 | -0.85 | 0.72  | 0.51708 |
| <i>miR-192</i>     | 106.77 (56.28-315.86; 54.58)        | 97.28   | 115.28 (46.97-181.2; 28.96)         | 115.88   | 0.93 | -0.66 | 0.44  | 0.61594 |
| <i>miR-193a-3p</i> | 51.5 (32.01-79.34; 12.3)            | 48.58   | 54.18 (37.75-77.79; 9.6)            | 53.68    | 0.95 | -0.82 | 0.68  | 0.52825 |
| <i>miR-193a-5p</i> | 35.59 (31.7-38.64; 1.63)            | 35.37   | 37.51 (32.21-52.9; 4.3)             | 36.69    | 0.95 | -1.93 | 3.74  | 0.14175 |
| <i>miR-193b*</i>   | 34.52 (31.07-37.83; 1.71)           | 34.22   | 35.48 (31.02-39.31; 2.04)           | 35.88    | 0.97 | -1.62 | 2.64  | 0.21408 |

|                                |                                     |         |                                    |         |      |       |       |         |
|--------------------------------|-------------------------------------|---------|------------------------------------|---------|------|-------|-------|---------|
| <i>miR-194</i>                 | 211.98 (110.23-782.51; 139.76)      | 183.22  | 210.31 (76.21-370.26; 63.36)       | 203.30  | 1.01 | 0.05  | <0.01 | 0.96803 |
| <b><i>miR-195</i></b>          | 156.44 (81.92-356.87; 63.44)        | 151.11  | 242 (66.42-421.8; 93.21)           | 231.30  | 0.65 | -3.61 | 13.02 | 0.00894 |
| <i>miR-196a*</i>               | 49.33 (25.6-85.37; 14.88)           | 48.13   | 48.2 (25.9-68.94; 12.06)           | 48.52   | 1.02 | 0.28  | 0.08  | 0.84721 |
| <i>miR-197</i>                 | 100.78 (63.02-167.05; 27.37)        | 96.90   | 119.43 (55.68-185.85; 28.31)       | 121.81  | 0.84 | -2.26 | 5.11  | 0.08922 |
| <i>miR-1973</i>                | 36.44 (30.25-49.1; 4)               | 35.91   | 34.83 (30.03-46.45; 3.5)           | 34.27   | 1.05 | 1.43  | 2.04  | 0.27616 |
| <b><i>miR-1976</i></b>         | 1141.76 (236.28-2384.41; 601.13)    | 1124.27 | 1936.79 (558.16-3532.59; 853.76)   | 2021.05 | 0.59 | -3.62 | 13.12 | 0.00883 |
| <i>miR-198</i>                 | 43.97 (36.06-52.67; 4.63)           | 44.84   | 41.24 (33.53-50.44; 4.57)          | 40.46   | 1.07 | 1.98  | 3.94  | 0.13082 |
| <i>miR-199a-3p/miR-199b-3p</i> | 34.4 (24.65-49.18; 6.04)            | 33.89   | 32.79 (24.31-44; 5.4)              | 33.31   | 1.05 | 0.95  | 0.90  | 0.46685 |
| <i>miR-199a-5p</i>             | 70.03 (34.53-143.41; 32.62)         | 60.56   | 57.65 (33.66-105.25; 15.63)        | 55.94   | 1.21 | 1.65  | 2.71  | 0.20650 |
| <i>miR-199b-5p</i>             | 34.92 (28.01-42.35; 3.77)           | 34.96   | 32.85 (26.97-39.57; 3.13)          | 32.66   | 1.06 | 1.98  | 3.93  | 0.13082 |
| <i>miR-19a</i>                 | 346.21 (116-766.8; 193.68)          | 284.69  | 321.72 (93.59-636.05; 117.85)      | 323.04  | 1.08 | 0.52  | 0.27  | 0.69635 |
| <i>miR-19b</i>                 | 2353.74 (593.58-5971.5; 1616.42)    | 1762.68 | 1701.85 (219.95-2887.16; 681.78)   | 1692.05 | 1.38 | 1.79  | 3.20  | 0.17512 |
| <b><i>miR-200a</i></b>         | 38.12 (27.89-52.96; 6.36)           | 37.81   | 33.51 (26.81-47.5; 5.14)           | 33.24   | 1.14 | 2.68  | 7.18  | 0.04431 |
| <i>miR-200b</i>                | 37.01 (29.38-51.8; 5.31)            | 35.50   | 35.71 (28.28-50.68; 5.99)          | 34.59   | 1.04 | 0.77  | 0.60  | 0.55262 |
| <i>miR-200c</i>                | 35.06 (26.34-51.49; 6.29)           | 33.30   | 33.36 (26.53-48.72; 5.56)          | 33.10   | 1.05 | 0.96  | 0.93  | 0.46152 |
| <i>miR-202</i>                 | 32.3 (29.57-35.09; 1.68)            | 32.25   | 33.39 (30.92-38.76; 1.76)          | 33.17   | 0.97 | -1.99 | 3.95  | 0.13082 |
| <i>miR-202*</i>                | 48.72 (36.82-61.26; 7.47)           | 48.19   | 43.55 (34.19-55.59; 6.26)          | 42.07   | 1.12 | 2.53  | 6.38  | 0.05688 |
| <i>miR-204</i>                 | 42.91 (36.59-46.66; 2.93)           | 43.45   | 41.43 (33.48-47.02; 3.36)          | 41.56   | 1.04 | 1.55  | 2.41  | 0.23758 |
| <i>miR-205</i>                 | 53.05 (36.12-83.42; 11.64)          | 50.38   | 46.51 (33.62-77.42; 11.15)         | 44.62   | 1.14 | 1.94  | 3.75  | 0.14175 |
| <b><i>miR-205*</i></b>         | 78.52 (61.61-99.99; 10.31)          | 76.54   | 69.12 (60.91-86.86; 6.23)          | 69.58   | 1.14 | 3.74  | 13.96 | 0.00723 |
| <i>miR-206</i>                 | 41.83 (34.46-55.24; 5.59)           | 42.47   | 39.42 (31.96-51.61; 4.89)          | 39.32   | 1.06 | 1.54  | 2.38  | 0.24108 |
| <b><i>miR-20a</i></b>          | 315.49 (117.64-1009.48; 215.14)     | 275.17  | 560.07 (136.77-1413.7; 295.46)     | 540.34  | 0.56 | -3.18 | 10.14 | 0.01914 |
| <b><i>miR-20b</i></b>          | 50.43 (27.11-109.55; 24.24)         | 38.99   | 83.2 (26.11-188.58; 43.62)         | 79.55   | 0.61 | -3.12 | 9.71  | 0.02144 |
| <b><i>miR-21</i></b>           | 91.51 (59.81-147.09; 24.73)         | 86.92   | 119.91 (77.62-228.72; 34.12)       | 116.85  | 0.76 | -3.21 | 10.28 | 0.01864 |
| <b><i>miR-210</i></b>          | 48.32 (26.27-95.81; 18.76)          | 42.74   | 67.9 (29.69-134.86; 27.35)         | 66.01   | 0.71 | -2.81 | 7.87  | 0.03579 |
| <i>miR-2115*</i>               | 34.13 (28.18-52.73; 4.94)           | 32.90   | 35.44 (28.86-40.8; 3.15)           | 36.51   | 0.96 | -1.05 | 1.11  | 0.42970 |
| <b><i>miR-2116</i></b>         | 56.31 (46.9-67.25; 6.02)            | 56.44   | 48.97 (41.9-52.94; 2.97)           | 50.01   | 1.15 | 5.21  | 27.15 | 0.00033 |
| <i>miR-214</i>                 | 37.8 (28.95-56.65; 6.56)            | 37.79   | 35.59 (28.01-50.46; 5.83)          | 35.05   | 1.06 | 1.20  | 1.43  | 0.36934 |
| <i>miR-215</i>                 | 136.77 (74.45-374.23; 61.04)        | 133.02  | 139.83 (61.64-214.52; 30.67)       | 140.20  | 0.98 | -0.22 | 0.05  | 0.87769 |
| <i>miR-22</i>                  | 7276.87 (3091.68-18323.76; 3745.44) | 6262.72 | 7182.75 (2684.6-12895.15; 2889.49) | 6990.67 | 1.01 | 0.10  | 0.01  | 0.93836 |
| <i>miR-22*</i>                 | 75.98 (57.37-105.85; 12.34)         | 75.38   | 75.51 (50.69-104.51; 11.74)        | 74.31   | 1.01 | 0.13  | 0.02  | 0.92430 |
| <b><i>miR-221</i></b>          | 51.62 (44.76-70.74; 6.36)           | 50.22   | 58.52 (44.98-75.54; 8.34)          | 58.14   | 0.88 | -3.12 | 9.71  | 0.02144 |
| <i>miR-222</i>                 | 95.81 (69.24-138.59; 18.54)         | 94.46   | 102.29 (74.72-133.38; 14.21)       | 102.28  | 0.94 | -1.33 | 1.76  | 0.31338 |
| <i>miR-223</i>                 | 7440.93 (3212.02-13971.51; 3319.86) | 6021.86 | 6982.53 (1514.29-12955.3; 2420.13) | 6797.33 | 1.07 | 0.53  | 0.29  | 0.68737 |
| <b><i>miR-223*</i></b>         | 34.13 (32.02-37.22; 1.36)           | 33.81   | 31.38 (28.79-34.18; 1.63)          | 31.03   | 1.09 | 5.63  | 31.71 | 0.00012 |
| <i>miR-224</i>                 | 33.46 (29.07-37.22; 2.25)           | 33.78   | 35.13 (31.08-42.57; 2.82)          | 34.94   | 0.95 | -2.13 | 4.53  | 0.10696 |
| <i>miR-23a</i>                 | 609.65 (262.95-1325.85; 263.28)     | 586.22  | 537.8 (229.55-828.2; 133.51)       | 544.86  | 1.13 | 1.17  | 1.37  | 0.37417 |
| <i>miR-23b</i>                 | 946.92 (467.95-2213.02; 385.5)      | 873.79  | 792.5 (284.59-1089.12; 197.63)     | 861.45  | 1.19 | 1.71  | 2.94  | 0.19155 |
| <i>miR-24</i>                  | 630.38 (406.32-1208.5; 186.49)      | 618.64  | 658.87 (247.3-1066.18; 206.21)     | 665.90  | 0.96 | -0.49 | 0.24  | 0.71338 |
| <i>miR-24-1*</i>               | 81.2 (54.91-122.43; 15.41)          | 80.06   | 85.3 (51.49-116.88; 15.93)         | 87.45   | 0.95 | -0.88 | 0.78  | 0.49929 |
| <i>miR-25</i>                  | 1170.76 (668.03-1673.73; 284.65)    | 1207.38 | 1339.17 (408.86-2255.76; 428.24)   | 1338.84 | 0.87 | -1.56 | 2.42  | 0.23658 |
| <i>miR-25*</i>                 | 42.03 (33.97-60.88; 5.73)           | 40.34   | 40.56 (29.67-46.91; 3.62)          | 40.60   | 1.04 | 1.03  | 1.07  | 0.43916 |
| <i>miR-26a</i>                 | 1458.93 (845.47-2090.32; 364.27)    | 1535.26 | 1585.4 (504.06-2517.06; 406.7)     | 1645.25 | 0.92 | -1.10 | 1.22  | 0.40607 |

|                   |                                    |         |                                   |         |      |       |       |         |
|-------------------|------------------------------------|---------|-----------------------------------|---------|------|-------|-------|---------|
| <b>miR-26b</b>    | 313.57 (187.81-524.53; 77.27)      | 305.56  | 453.61 (143.59-949.03; 169.17)    | 447.29  | 0.69 | -3.57 | 12.73 | 0.00952 |
| <i>miR-26b*</i>   | 32.56 (27.94-42.97; 3.24)          | 31.53   | 31.77 (26.99-35.52; 2.32)         | 31.89   | 1.02 | 0.92  | 0.85  | 0.48208 |
| <i>miR-27a</i>    | 65.58 (47.25-87.86; 12.5)          | 62.39   | 63 (51.75-76.8; 8.51)             | 59.18   | 1.04 | 0.82  | 0.66  | 0.53175 |
| <i>miR-27b</i>    | 50.85 (37.94-71.4; 9.92)           | 47.94   | 50.26 (39.33-63.11; 6.82)         | 50.26   | 1.01 | 0.23  | 0.05  | 0.86965 |
| <i>miR-28-5p</i>  | 59.1 (31.78-91.25; 18.18)          | 56.04   | 70.55 (30.04-137.61; 23.31)       | 70.54   | 0.84 | -1.84 | 3.40  | 0.16209 |
| <i>miR-296-5p</i> | 53.3 (45.37-58.75; 3.54)           | 54.05   | 51.88 (41.75-57.28; 4.42)         | 52.97   | 1.03 | 1.18  | 1.38  | 0.37332 |
| <i>miR-299-3p</i> | 27.16 (14.03-67.05; 12.62)         | 23.48   | 33.4 (13.79-89.69; 18.21)         | 29.95   | 0.81 | -1.34 | 1.79  | 0.31150 |
| <i>miR-29a</i>    | 144.68 (66.18-296.22; 64.21)       | 119.59  | 133.66 (78.24-214.91; 39)         | 125.90  | 1.08 | 0.70  | 0.50  | 0.59085 |
| <i>miR-29b</i>    | 316.63 (131.77-811.82; 170.81)     | 237.25  | 301.13 (85.02-510.23; 116.04)     | 292.87  | 1.05 | 0.36  | 0.13  | 0.79396 |
| <i>miR-29b-2*</i> | 28.03 (20.04-55.47; 9.67)          | 23.99   | 30.88 (19.42-46.36; 7.77)         | 31.49   | 0.91 | -1.10 | 1.20  | 0.41054 |
| <i>miR-29c</i>    | 66.04 (36.13-119.4; 24.99)         | 55.44   | 70.65 (44.42-128.64; 19.21)       | 64.41   | 0.93 | -0.70 | 0.49  | 0.59198 |
| <i>miR-29c*</i>   | 42.32 (29.96-71.12; 8.84)          | 41.23   | 41.15 (25.62-53.27; 6.45)         | 41.36   | 1.03 | 0.51  | 0.26  | 0.69967 |
| <i>miR-300</i>    | 61.52 (47.13-82.98; 7.64)          | 60.35   | 57.84 (50.62-63.95; 4.08)         | 58.60   | 1.06 | 2.03  | 4.12  | 0.12187 |
| <b>miR-301a</b>   | 29.15 (21.07-49.39; 8.3)           | 24.37   | 38.24 (20.16-83.08; 13.51)        | 37.16   | 0.76 | -2.72 | 7.39  | 0.04194 |
| <i>miR-30a</i>    | 89.3 (54.24-160.58; 24.62)         | 91.64   | 94.33 (56.34-132.58; 21.67)       | 95.63   | 0.95 | -0.73 | 0.54  | 0.57660 |
| <i>miR-30b</i>    | 3296.72 (1194.87-5857.69; 1321.74) | 2764.15 | 2521.33 (532.29-3446.48; 693.09)  | 2700.82 | 1.31 | 2.50  | 6.24  | 0.06005 |
| <i>miR-30c</i>    | 4089.42 (1333.93-6525.43; 1508.41) | 3895.46 | 3584.19 (1065.98-5419.78; 964.07) | 3610.72 | 1.14 | 1.35  | 1.83  | 0.30338 |
| <i>miR-30d</i>    | 437.61 (219.5-802.18; 137.83)      | 413.86  | 484.48 (245.09-706.42; 107.18)    | 487.67  | 0.90 | -1.29 | 1.65  | 0.33125 |
| <i>miR-30e</i>    | 238.74 (112.97-503.87; 107.29)     | 198.36  | 272.28 (93.17-529.48; 101.74)     | 265.21  | 0.88 | -1.08 | 1.17  | 0.41627 |
| <i>miR-30e*</i>   | 141.21 (63.39-251.71; 46.51)       | 133.09  | 129.7 (46.49-214.77; 33.27)       | 133.16  | 1.09 | 0.96  | 0.93  | 0.46152 |
| <b>miR-32*</b>    | 146.41 (120.49-182.44; 16.45)      | 145.91  | 131.49 (103.67-161.5; 14.29)      | 130.39  | 1.11 | 3.27  | 10.70 | 0.01673 |
| <b>miR-3202</b>   | 49.26 (37.05-74.44; 9.09)          | 47.07   | 41.74 (30.77-72.95; 9.08)         | 40.71   | 1.18 | 2.78  | 7.75  | 0.03697 |
| <b>miR-320a</b>   | 217.02 (125.36-456.81; 84.03)      | 188.20  | 335.37 (163.66-875.64; 171.35)    | 322.10  | 0.65 | -2.94 | 8.65  | 0.02875 |
| <b>miR-320b</b>   | 200.87 (120.64-410.83; 73.78)      | 174.04  | 310.47 (155.81-799.47; 155.7)     | 289.21  | 0.65 | -3.02 | 9.09  | 0.02518 |
| <b>miR-320c</b>   | 207.32 (122.87-434.67; 83.05)      | 178.33  | 339.03 (159.1-856.97; 172.55)     | 321.27  | 0.61 | -3.26 | 10.63 | 0.01692 |
| <b>miR-320d</b>   | 159.6 (97.62-325.91; 58.81)        | 139.99  | 242.34 (126.94-615.37; 118.19)    | 220.87  | 0.66 | -2.97 | 8.83  | 0.02689 |
| <i>miR-324-3p</i> | 63.75 (33.8-92.82; 18.54)          | 61.62   | 78.09 (37.44-110.54; 20.99)       | 81.88   | 0.82 | -2.44 | 5.96  | 0.06586 |
| <b>miR-324-5p</b> | 69.34 (39.32-116.15; 20.9)         | 62.12   | 87.85 (51.96-130.58; 22.54)       | 82.72   | 0.79 | -2.87 | 8.25  | 0.03163 |
| <b>miR-326</b>    | 513.77 (102.2-933.29; 261.23)      | 531.90  | 739.33 (266.07-1406.34; 301.85)   | 754.32  | 0.69 | -2.69 | 7.26  | 0.04327 |
| <i>miR-328</i>    | 85.43 (60.67-106.38; 13.43)        | 84.22   | 91.53 (61.64-156.84; 18.01)       | 88.36   | 0.93 | -1.29 | 1.67  | 0.33031 |
| <i>miR-331-3p</i> | 335.39 (169.47-797.4; 136.02)      | 288.06  | 326.27 (147.65-531.13; 77.05)     | 328.39  | 1.03 | 0.28  | 0.08  | 0.84721 |
| <i>miR-335</i>    | 91.24 (40.82-196.65; 31.01)        | 87.45   | 88.03 (57.91-150.83; 22.28)       | 82.05   | 1.04 | 0.40  | 0.16  | 0.76833 |
| <i>miR-335*</i>   | 590.09 (348.13-940.25; 164.72)     | 561.98  | 507.73 (248.76-1269.62; 218.83)   | 434.67  | 1.16 | 1.43  | 2.05  | 0.27506 |
| <i>miR-338-3p</i> | 33.5 (29.84-36.63; 1.73)           | 33.36   | 31.98 (26.72-35.44; 2.41)         | 31.87   | 1.05 | 2.31  | 5.35  | 0.08032 |
| <i>miR-339-3p</i> | 71.23 (28.53-138.29; 29.61)        | 69.89   | 78.22 (30.82-133.16; 26.04)       | 76.19   | 0.91 | -0.85 | 0.72  | 0.51708 |
| <i>miR-339-5p</i> | 455.77 (122.17-891.72; 215.98)     | 436.32  | 332.27 (90.23-581.56; 114.96)     | 309.35  | 1.37 | 2.43  | 5.89  | 0.06770 |
| <i>miR-340</i>    | 36.89 (30.98-43.11; 3.38)          | 35.68   | 38.65 (33.88-52.4; 4.26)          | 37.49   | 0.95 | -1.52 | 2.30  | 0.24627 |
| <i>miR-340*</i>   | 37.61 (27.26-62.09; 10.06)         | 34.76   | 38.72 (22.67-55.79; 7.24)         | 37.82   | 0.97 | -0.43 | 0.18  | 0.75212 |
| <i>miR-342-3p</i> | 274.07 (135.07-478.59; 87.57)      | 262.39  | 305.57 (154.7-434.31; 84.4)       | 304.84  | 0.90 | -1.24 | 1.53  | 0.34983 |
| <i>miR-34a</i>    | 46.89 (30.86-68.24; 8.98)          | 46.53   | 42.59 (34.28-61.57; 7.68)         | 42.61   | 1.10 | 1.74  | 3.02  | 0.18659 |
| <i>miR-34b</i>    | 227.13 (127.64-412.72; 84.69)      | 210.57  | 216.68 (132.47-323.35; 62.02)     | 216.35  | 1.05 | 0.48  | 0.23  | 0.71877 |
| <i>miR-361-3p</i> | 90.75 (75.52-103.75; 6.14)         | 90.08   | 91.98 (79.27-120.93; 9.66)        | 90.26   | 0.99 | -0.51 | 0.26  | 0.70230 |
| <i>miR-361-5p</i> | 79.36 (58.38-118.65; 14.83)        | 76.79   | 80.79 (55.04-94.84; 11.04)        | 84.01   | 0.98 | -0.37 | 0.14  | 0.78955 |

|                                                                      |                                       |          |                                       |          |      |       |       |         |
|----------------------------------------------------------------------|---------------------------------------|----------|---------------------------------------|----------|------|-------|-------|---------|
| <i>miR-362-5p</i>                                                    | 49.42 (33.89-77.84; 13.25)            | 42.37    | 56.74 (29.98-99.82; 17.18)            | 56.37    | 0.87 | -1.60 | 2.57  | 0.21963 |
| <i>miR-363</i>                                                       | 595.42 (351.54-994.23; 207.56)        | 544.44   | 694.76 (137.65-1204.01; 270.2)        | 681.56   | 0.86 | -1.39 | 1.93  | 0.28837 |
| <i>miR-363*</i>                                                      | 37.11 (30.38-45.46; 3.84)             | 35.96    | 34.8 (30.4-48.94; 3.55)               | 34.16    | 1.07 | 2.08  | 4.31  | 0.11483 |
| <i>miR-365</i>                                                       | 85.94 (62.07-114.36; 14.48)           | 86.16    | 89.68 (70.95-129.9; 15.13)            | 89.72    | 0.96 | -0.85 | 0.73  | 0.51650 |
| <i>miR-374a</i>                                                      | 89.73 (29.86-206.87; 49.73)           | 71.93    | 102.58 (24.17-227.24; 48.38)          | 104.94   | 0.87 | -0.88 | 0.78  | 0.49929 |
| <b><i>miR-374b/miR-374c</i></b>                                      | 77.05 (25.51-178.06; 36.46)           | 69.47    | 112.17 (22.36-239.06; 46.7)           | 111.14   | 0.69 | -2.82 | 7.96  | 0.03472 |
| <i>miR-378/miR-378c</i>                                              | 113.47 (74.1-183.99; 32)              | 105.53   | 124.09 (75.84-216.78; 31.29)          | 122.19   | 0.91 | -1.13 | 1.28  | 0.39434 |
| <i>miR-384</i>                                                       | 30.68 (20.41-50.06; 8.86)             | 26.61    | 27.72 (18.66-36.1; 4.63)              | 29.02    | 1.11 | 1.42  | 2.00  | 0.27698 |
| <i>miR-3943</i>                                                      | 32.64 (29.03-35.33; 1.86)             | 32.81    | 32.2 (28.03-42.95; 2.88)              | 32.06    | 1.01 | 0.59  | 0.34  | 0.66055 |
| <i>miR-423-3p</i>                                                    | 424.63 (267.56-869.43; 140.6)         | 407.62   | 358.81 (210.85-529.87; 71.87)         | 362.46   | 1.18 | 2.00  | 4.02  | 0.12723 |
| <b><i>miR-423-5p</i></b>                                             | 522.66 (307.27-909.7; 171.37)         | 496.31   | 708.75 (380.77-1316.36; 256.12)       | 643.07   | 0.74 | -2.87 | 8.24  | 0.03163 |
| <i>miR-424</i>                                                       | 57.61 (35.16-81.66; 11.51)            | 56.47    | 57.53 (43.71-76.87; 9.38)             | 56.16    | 1.00 | 0.03  | <0.01 | 0.98184 |
| <i>miR-425</i>                                                       | 488.29 (168.86-801.87; 183.71)        | 450.16   | 595.5 (126.33-1164.18; 242.18)        | 628.89   | 0.82 | -1.68 | 2.82  | 0.20052 |
| <i>miR-425*</i>                                                      | 31.44 (23.91-43.11; 5.94)             | 29.97    | 35.64 (23.66-50.03; 7.67)             | 35.20    | 0.88 | -2.06 | 4.23  | 0.11617 |
| <b><i>miR-450a</i></b>                                               | 39.22 (33.96-42.85; 2.26)             | 39.67    | 36.33 (32.92-43.47; 2.23)             | 36.10    | 1.08 | 4.16  | 17.31 | 0.00298 |
| <i>miR-451</i>                                                       | 32594.25 (20177.97-47418.38; 6698.16) | 34768.30 | 31812.88 (19324.36-45081.27; 7180.75) | 31452.67 | 1.02 | 0.38  | 0.14  | 0.78300 |
| <i>miR-483-3p</i>                                                    | 140.68 (98.26-225.28; 32.16)          | 132.83   | 139.15 (97.51-201.9; 28.04)           | 141.38   | 1.01 | 0.17  | 0.03  | 0.90478 |
| <i>miR-483-5p</i>                                                    | 44.92 (35.77-52.44; 4.69)             | 45.23    | 41.05 (32.08-53.72; 5.27)             | 39.80    | 1.09 | 2.59  | 6.71  | 0.05024 |
| <i>miR-484</i>                                                       | 590 (393.99-827.24; 117.27)           | 567.97   | 642.24 (362.38-994.5; 146.73)         | 662.63   | 0.92 | -1.32 | 1.75  | 0.31414 |
| <i>miR-485-3p</i>                                                    | 39.81 (34.82-45.76; 2.8)              | 39.77    | 40.73 (33.5-47.11; 3.99)              | 41.83    | 0.98 | -0.88 | 0.78  | 0.49929 |
| <i>miR-485-5p</i>                                                    | 35.07 (32.31-37.65; 1.38)             | 34.93    | 33.67 (30.8-38.82; 2.08)              | 33.42    | 1.04 | 2.49  | 6.20  | 0.06005 |
| <i>miR-486-5p</i>                                                    | 7571.66 (4342.52-10243.01; 1721.88)   | 8192.17  | 7904.49 (4498.4-11401.37; 1740.28)    | 7739.88  | 0.96 | -0.65 | 0.42  | 0.62317 |
| <i>miR-491-3p</i>                                                    | 43.71 (33.05-56.36; 7.09)             | 44.53    | 43.41 (27.91-60.75; 7.51)             | 42.91    | 1.01 | 0.14  | 0.02  | 0.92430 |
| <b><i>miR-494</i></b>                                                | 182.07 (107.57-302.03; 43.97)         | 177.17   | 137.38 (108.4-174.96; 17.39)          | 136.08   | 1.33 | 4.55  | 20.71 | 0.00134 |
| <i>miR-498</i>                                                       | 57.03 (44.7-79.55; 7.73)              | 56.29    | 58.47 (48.33-79.28; 7.58)             | 58.12    | 0.98 | -0.63 | 0.40  | 0.63332 |
| <i>miR-500a</i>                                                      | 39.64 (28.68-59.25; 8.25)             | 36.25    | 44.31 (30.47-77.32; 10.42)            | 44.72    | 0.89 | -1.67 | 2.79  | 0.20279 |
| <i>miR-500a*</i>                                                     | 66.72 (36.64-117.77; 22.33)           | 61.97    | 82.32 (35.03-174.96; 31.96)           | 80.47    | 0.81 | -1.90 | 3.62  | 0.14895 |
| <b><i>miR-501-5p</i></b>                                             | 30.99 (24.69-42.1; 5.04)              | 29.68    | 36.5 (24.45-62.25; 8.55)              | 36.49    | 0.85 | -2.62 | 6.88  | 0.04934 |
| <i>miR-502-3p</i>                                                    | 59.71 (22.05-119.71; 29.72)           | 50.72    | 78.51 (25.1-179.84; 35.92)            | 77.30    | 0.76 | -1.92 | 3.69  | 0.14510 |
| <i>miR-505</i>                                                       | 37.17 (26.44-64.19; 9.07)             | 36.10    | 35.86 (23.07-50.86; 6.4)              | 33.47    | 1.04 | 0.56  | 0.32  | 0.66938 |
| <i>miR-505*</i>                                                      | 75.45 (63.31-92.92; 8.02)             | 72.67    | 78.43 (55.2-92.52; 8.16)              | 79.72    | 0.96 | -1.24 | 1.53  | 0.34983 |
| <i>miR-508-3p</i>                                                    | 32.04 (29.63-34.56; 1.36)             | 31.90    | 31.18 (27.68-33.76; 1.6)              | 31.50    | 1.03 | 1.79  | 3.21  | 0.17512 |
| <i>miR-513a-5p</i>                                                   | 129.68 (82.43-164.59; 23.18)          | 132.58   | 118.84 (81.65-179.71; 20.4)           | 114.74   | 1.09 | 1.68  | 2.82  | 0.20052 |
| <i>miR-513c</i>                                                      | 32.82 (30.12-35.79; 1.42)             | 33.14    | 31.95 (28.53-37.57; 2.28)             | 31.59    | 1.03 | 1.45  | 2.11  | 0.26887 |
| <i>miR-516a-5p</i>                                                   | 42.63 (33.76-50.66; 4.2)              | 41.94    | 37.71 (28.38-73.77; 8.95)             | 35.31    | 1.13 | 2.35  | 5.51  | 0.07578 |
| <i>miR-516b</i>                                                      | 37.76 (29.74-51.89; 5.9)              | 36.89    | 33.87 (26.6-47.34; 4.95)              | 34.09    | 1.11 | 2.40  | 5.75  | 0.07074 |
| <b><i>miR-517b</i></b>                                               | 43.27 (38.07-47.63; 3.27)             | 42.79    | 39.87 (35.32-44.96; 3.23)             | 39.36    | 1.09 | 3.46  | 12.00 | 0.01196 |
| <b><i>miR-517c</i></b>                                               | 40.2 (35.27-48.88; 3.1)               | 39.97    | 36.41 (32.48-39.57; 2)                | 36.69    | 1.10 | 4.77  | 22.74 | 0.00095 |
| <i>miR-518b</i>                                                      | 35.04 (27.06-51.27; 5.66)             | 34.14    | 35.91 (28.73-52.88; 5.61)             | 35.28    | 0.98 | -0.52 | 0.27  | 0.69635 |
| <i>miR-518e*/miR-519a*/miR-519b-5p/miR-519c-5p/miR-522*/miR-523*</i> | 37.97 (32.1-45.48; 4.01)              | 37.68    | 35.83 (28.37-50.83; 5.57)             | 35.15    | 1.06 | 1.47  | 2.15  | 0.26478 |
| <i>miR-519b-3p</i>                                                   | 35.43 (23.03-55.75; 7.64)             | 34.66    | 33.59 (23.5-54.35; 8.01)              | 32.42    | 1.05 | 0.79  | 0.62  | 0.54625 |

|                           |                                 |        |                                 |        |      |       |       |         |
|---------------------------|---------------------------------|--------|---------------------------------|--------|------|-------|-------|---------|
| <i>miR-519d</i>           | 48.58 (39.63-58.4; 5.28)        | 49.14  | 46.11 (38.62-67.2; 6.33)        | 44.21  | 1.05 | 1.42  | 2.01  | 0.27698 |
| <i>miR-519e*</i>          | 36.18 (31.64-42.13; 2.85)       | 36.21  | 35.3 (30.02-41.87; 2.93)        | 35.38  | 1.02 | 1.00  | 1.00  | 0.45122 |
| <b><i>miR-520d-5p</i></b> | 37.39 (27.09-52.81; 6.43)       | 35.71  | 42.16 (32.98-51.51; 5.85)       | 42.22  | 0.89 | -2.61 | 6.80  | 0.04986 |
| <i>miR-521</i>            | 32.19 (23.71-42.74; 4.93)       | 31.82  | 30.36 (23.02-42.1; 4.85)        | 29.72  | 1.06 | 1.25  | 1.57  | 0.34646 |
| <i>miR-522</i>            | 32.5 (27.4-41.65; 2.77)         | 31.90  | 34.26 (27.72-40.21; 3.53)       | 33.37  | 0.95 | -1.83 | 3.33  | 0.16636 |
| <b><i>miR-525-5p</i></b>  | 43.25 (33.2-55.38; 5.3)         | 41.76  | 37.7 (30.18-53.73; 5.68)        | 36.63  | 1.15 | 3.38  | 11.45 | 0.01409 |
| <i>miR-532-3p</i>         | 86.11 (46.41-121.81; 16.41)     | 86.97  | 95.6 (44.97-144.99; 24.84)      | 92.76  | 0.90 | -1.51 | 2.29  | 0.24647 |
| <i>miR-532-5p</i>         | 48.21 (23.64-89.63; 18.57)      | 42.22  | 64.83 (24.7-123.24; 26.38)      | 67.31  | 0.74 | -2.45 | 6.00  | 0.06518 |
| <i>miR-550a</i>           | 41.86 (25.35-76.03; 13.44)      | 38.08  | 49.34 (24.95-81.45; 14.71)      | 49.28  | 0.85 | -1.79 | 3.20  | 0.17512 |
| <i>miR-550a*</i>          | 149.38 (62.32-322.87; 67.74)    | 127.71 | 160.26 (38.85-287.53; 53.33)    | 163.27 | 0.93 | -0.60 | 0.36  | 0.64782 |
| <i>miR-551a</i>           | 33.03 (30.41-36.03; 1.59)       | 33.05  | 33.69 (28.64-39.72; 2.28)       | 33.72  | 0.98 | -1.06 | 1.13  | 0.42557 |
| <i>miR-551b</i>           | 493.03 (254.67-928.98; 188.43)  | 455.32 | 406.77 (262.58-704.83; 108.71)  | 379.53 | 1.21 | 1.90  | 3.63  | 0.14895 |
| <b><i>miR-574-3p</i></b>  | 79.42 (59.99-105.52; 12.13)     | 79.51  | 88.46 (73.45-105.57; 7.82)      | 88.47  | 0.90 | -3.00 | 9.00  | 0.02593 |
| <b><i>miR-574-5p</i></b>  | 106.21 (91.36-137.16; 12.03)    | 105.88 | 96.12 (78.93-115.4; 8.94)       | 93.90  | 1.11 | 3.22  | 10.37 | 0.01828 |
| <i>miR-576-5p</i>         | 186.31 (78.52-335.35; 82.1)     | 165.63 | 197.86 (39.2-298.39; 63.23)     | 213.27 | 0.94 | -0.53 | 0.28  | 0.68737 |
| <b><i>miR-583</i></b>     | 58.13 (46.07-75.54; 6.97)       | 58.71  | 52.64 (41.89-70.85; 6.88)       | 52.63  | 1.10 | 2.66  | 7.10  | 0.04574 |
| <i>miR-584</i>            | 45.24 (27.73-73.07; 13.95)      | 42.57  | 59.22 (25.76-128.76; 22.72)     | 57.99  | 0.76 | -2.49 | 6.20  | 0.06005 |
| <i>miR-585</i>            | 32.63 (29.07-37.92; 2.49)       | 31.62  | 31.09 (27.43-38.8; 2.41)        | 31.21  | 1.05 | 2.05  | 4.22  | 0.11617 |
| <b><i>miR-593</i></b>     | 36.15 (32.74-39.46; 1.49)       | 36.34  | 34.42 (31.48-37.73; 1.78)       | 33.85  | 1.05 | 3.29  | 10.80 | 0.01639 |
| <i>miR-593*</i>           | 34.25 (22.88-48.72; 7.8)        | 32.81  | 36.84 (23.56-54.53; 8.29)       | 36.72  | 0.93 | -1.08 | 1.17  | 0.41627 |
| <b><i>miR-601</i></b>     | 35.59 (32.05-40.88; 2.22)       | 35.40  | 32.95 (29.69-35.08; 1.28)       | 32.89  | 1.08 | 4.64  | 21.49 | 0.00131 |
| <i>miR-602</i>            | 49.47 (42.31-71.53; 6.8)        | 49.17  | 48.44 (35.52-57.44; 5.03)       | 48.50  | 1.02 | 0.58  | 0.34  | 0.66140 |
| <i>miR-615-5p</i>         | 35.56 (32.18-39.26; 2.07)       | 35.79  | 35.03 (29.9-42.71; 2.64)        | 35.20  | 1.02 | 0.72  | 0.52  | 0.58033 |
| <i>miR-617</i>            | 34.69 (32.18-38.6; 1.9)         | 34.90  | 33.38 (30.77-39.39; 1.87)       | 33.23  | 1.04 | 2.22  | 4.91  | 0.09291 |
| <i>miR-618</i>            | 34.52 (30.79-38.91; 1.88)       | 34.42  | 32.96 (29.9-38.24; 2.34)        | 32.35  | 1.05 | 2.36  | 5.57  | 0.07474 |
| <b><i>miR-620</i></b>     | 62.23 (48.08-73.8; 7.45)        | 62.87  | 53.58 (43.81-68.31; 5.24)       | 53.31  | 1.16 | 4.53  | 20.48 | 0.00134 |
| <i>miR-622</i>            | 37.8 (34.17-40.92; 1.71)        | 37.85  | 37.21 (32.37-44.42; 2.82)       | 37.04  | 1.02 | 0.81  | 0.66  | 0.53345 |
| <i>miR-625</i>            | 35.51 (21.49-79.03; 13.2)       | 31.95  | 39.95 (22.91-75.49; 11.52)      | 38.79  | 0.89 | -1.21 | 1.47  | 0.36312 |
| <i>miR-625*</i>           | 85.61 (60.31-119.06; 14.99)     | 80.90  | 81.23 (65.02-136.28; 15.11)     | 78.67  | 1.05 | 0.98  | 0.96  | 0.45633 |
| <i>miR-628-3p</i>         | 126.01 (78.69-286.9; 48.45)     | 107.80 | 130.31 (82.83-197.68; 31.1)     | 124.39 | 0.97 | -0.36 | 0.13  | 0.79396 |
| <i>miR-629</i>            | 40.63 (28.96-66.23; 8.41)       | 39.35  | 47.03 (27.56-67.77; 10.62)      | 46.13  | 0.86 | -2.24 | 5.03  | 0.09028 |
| <b><i>miR-630</i></b>     | 41.1 (37.36-45.42; 2.43)        | 41.37  | 38.6 (36.32-42.48; 1.7)         | 38.52  | 1.06 | 3.84  | 14.76 | 0.00564 |
| <b><i>miR-634</i></b>     | 548.59 (190.18-1227.06; 274.62) | 496.03 | 749.81 (378.35-1229.78; 247.68) | 759.46 | 0.73 | -2.60 | 6.77  | 0.04992 |
| <i>miR-636</i>            | 35.4 (29.32-47.66; 4.01)        | 34.88  | 36.51 (26.5-43.14; 3.61)        | 36.25  | 0.97 | -0.97 | 0.94  | 0.46135 |
| <i>miR-637</i>            | 114.68 (55.84-265.41; 56.77)    | 97.56  | 131.64 (78.1-231.21; 39.99)     | 122.62 | 0.87 | -1.17 | 1.37  | 0.37417 |
| <i>miR-638</i>            | 62.31 (49.09-82.34; 7.85)       | 60.12  | 60.75 (51.21-78.87; 7.69)       | 58.07  | 1.03 | 0.68  | 0.46  | 0.60925 |
| <i>miR-642a</i>           | 118.26 (86.97-163.33; 17.49)    | 119.26 | 119.4 (95.95-149.96; 13.8)      | 115.90 | 0.99 | -0.24 | 0.06  | 0.86431 |
| <b><i>miR-652</i></b>     | 126.41 (49.51-267.15; 53.51)    | 123.52 | 202.94 (63.08-372.45; 75.64)    | 211.63 | 0.62 | -3.93 | 15.43 | 0.00493 |
| <i>miR-659</i>            | 35.3 (32.9-38.38; 1.58)         | 34.84  | 34.33 (30.7-38.74; 1.93)        | 34.43  | 1.03 | 1.73  | 2.98  | 0.18753 |
| <i>miR-660</i>            | 63.08 (36.93-109.95; 23.04)     | 50.90  | 73.83 (36.76-157.9; 27.84)      | 71.03  | 0.85 | -1.42 | 2.01  | 0.27698 |
| <i>miR-664</i>            | 79.04 (63.63-94.88; 7.7)        | 78.63  | 79.78 (70.86-91.72; 6.35)       | 79.98  | 0.99 | -0.35 | 0.13  | 0.79470 |
| <i>miR-665</i>            | 39.88 (31.29-59.02; 5.97)       | 38.73  | 38.89 (34.57-50.76; 4.35)       | 37.15  | 1.03 | 0.64  | 0.40  | 0.63024 |
| <b><i>miR-675</i></b>     | 44.81 (35.1-55.31; 5.24)        | 44.63  | 40.19 (32.42-52.45; 5.59)       | 39.88  | 1.12 | 2.86  | 8.15  | 0.03217 |

|                             |                                   |         |                                   |         |      |       |       |         |
|-----------------------------|-----------------------------------|---------|-----------------------------------|---------|------|-------|-------|---------|
| <i>miR-675*</i>             | 41.85 (36.76-47.97; 2.51)         | 41.54   | 41.22 (35.66-47.38; 2.79)         | 41.30   | 1.02 | 0.79  | 0.62  | 0.54725 |
| <i>miR-7</i>                | 88.34 (64.35-153.78; 23.06)       | 81.46   | 105.46 (61.72-155.56; 25.23)      | 108.00  | 0.84 | -2.39 | 5.71  | 0.07099 |
| <i>miR-718</i>              | 44.84 (37.17-55.93; 3.93)         | 44.78   | 53.23 (37.84-121.01; 16.27)       | 49.41   | 0.84 | -2.37 | 5.60  | 0.07438 |
| <b><i>miR-720</i></b>       | 340.15 (163.4-579.45; 119.55)     | 342.21  | 252.95 (154.14-455.46; 74.57)     | 238.94  | 1.34 | 2.97  | 8.82  | 0.02689 |
| <i>miR-744</i>              | 161.25 (111.13-280.29; 42.76)     | 145.36  | 178.97 (140.62-252.91; 28.83)     | 175.53  | 0.90 | -1.65 | 2.71  | 0.20650 |
| <b><i>miR-765</i></b>       | 98.55 (69.96-127.38; 15.92)       | 100.00  | 86.54 (58.64-119.37; 12.06)       | 86.25   | 1.14 | 2.88  | 8.28  | 0.03163 |
| <b><i>miR-766</i></b>       | 57.61 (42.7-75.07; 7.83)          | 57.13   | 67.4 (38.23-91.64; 12.12)         | 68.59   | 0.85 | -3.22 | 10.37 | 0.01828 |
| <i>miR-877</i>              | 35.79 (31.12-41.23; 2.73)         | 35.87   | 34.29 (30.91-38.09; 1.95)         | 34.25   | 1.04 | 2.06  | 4.26  | 0.11617 |
| <i>miR-877*</i>             | 38.87 (36.02-44.1; 2.1)           | 38.32   | 39.93 (33.55-67.04; 6.38)         | 39.15   | 0.97 | -0.74 | 0.55  | 0.57055 |
| <b><i>miR-885-5p</i></b>    | 62.64 (52.85-71.2; 4.74)          | 62.01   | 70.19 (53.53-88.13; 7.58)         | 70.63   | 0.89 | -3.99 | 15.92 | 0.00482 |
| <i>miR-888*</i>             | 101.04 (79.44-125.47; 14.66)      | 103.44  | 114.78 (86.19-186.09; 23.89)      | 108.08  | 0.88 | -2.33 | 5.42  | 0.07831 |
| <i>miR-891a</i>             | 29.83 (23.94-36.1; 4.26)          | 28.28   | 34.44 (23.51-68.6; 9.63)          | 32.21   | 0.87 | -2.06 | 4.25  | 0.11617 |
| <b><i>miR-892b</i></b>      | 33.42 (31.37-36.94; 1.66)         | 32.82   | 31.03 (28.73-35.5; 1.65)          | 30.56   | 1.08 | 4.50  | 20.27 | 0.00135 |
| <i>miR-92a</i>              | 6137.21 (3682.25-7585.89; 961.75) | 6273.77 | 6095.17 (4231.6-8086.36; 1110.34) | 6142.59 | 1.01 | 0.14  | 0.02  | 0.92430 |
| <i>miR-92b</i>              | 703.8 (403.24-1020.68; 150.33)    | 681.28  | 758.02 (279.07-1181.25; 213.18)   | 715.01  | 0.93 | -0.99 | 0.98  | 0.45289 |
| <b><i>miR-93</i></b>        | 585.97 (184.4-1562.58; 374.69)    | 439.86  | 980.62 (237.19-2015.51; 477.89)   | 1052.16 | 0.60 | -3.09 | 9.58  | 0.02185 |
| <i>miR-93*</i>              | 89.08 (45.9-173.42; 27.39)        | 85.35   | 89.67 (28.61-122.09; 24.29)       | 95.73   | 0.99 | -0.08 | 0.01  | 0.95151 |
| <i>miR-933</i>              | 129.39 (85.96-194.74; 30.34)      | 129.56  | 119.38 (79.76-165.13; 26.81)      | 115.59  | 1.08 | 1.18  | 1.40  | 0.37332 |
| <b><i>miR-942</i></b>       | 48.77 (41.92-57.79; 3.51)         | 48.84   | 43 (37.68-46.68; 2.31)            | 43.66   | 1.13 | 6.43  | 41.34 | 0.00002 |
| <i>miR-943</i>              | 64.87 (49.74-74.07; 7.27)         | 65.37   | 65.14 (52.41-92.39; 9.19)         | 63.10   | 1.00 | -0.11 | 0.01  | 0.92789 |
| <i>miR-96</i>               | 80.53 (39.8-146.1; 28.03)         | 75.63   | 99.17 (40.58-218.65; 41.81)       | 91.83   | 0.81 | -1.76 | 3.10  | 0.18095 |
| <i>miR-98</i>               | 368.69 (135.63-1290.59; 291.6)    | 282.28  | 501.71 (162.8-969.23; 223.14)     | 512.12  | 0.73 | -1.74 | 3.01  | 0.18659 |
| <i>miR-99a</i>              | 48.33 (27-79.86; 12.69)           | 46.94   | 41.69 (26.72-54.7; 6.15)          | 40.98   | 1.16 | 2.26  | 5.10  | 0.08922 |
| <i>miR-99b</i>              | 46.17 (30.56-62.6; 8.45)          | 44.59   | 45.16 (31.25-59.62; 6.21)         | 44.99   | 1.02 | 0.46  | 0.21  | 0.73036 |
| <i>miRPlus-A1015</i>        | 175.57 (79.42-324.77; 73.53)      | 173.18  | 150.24 (77.98-243.75; 41.91)      | 141.68  | 1.17 | 1.44  | 2.07  | 0.27323 |
| <i>miRPlus-A1072</i>        | 47.67 (32.93-59.09; 6.92)         | 48.74   | 46.12 (34.65-64.53; 7.03)         | 44.86   | 1.03 | 0.75  | 0.56  | 0.57037 |
| <i>miRPlus-A1073</i>        | 51.09 (44.93-58.43; 2.94)         | 51.13   | 52.25 (44.25-63.3; 4.81)          | 51.19   | 0.98 | -0.96 | 0.92  | 0.46181 |
| <b><i>miRPlus-C1110</i></b> | 312.42 (183.58-454.85; 62.17)     | 310.21  | 224.99 (139.41-329.64; 50.54)     | 218.01  | 1.39 | 5.22  | 27.28 | 0.00033 |
| <b><i>miRPlus-D1058</i></b> | 31.26 (22.13-54; 8.61)            | 29.00   | 40.78 (25.47-65.25; 10.33)        | 41.19   | 0.77 | -3.37 | 11.34 | 0.01442 |
| <b><i>miRPlus-E1012</i></b> | 31.98 (26.46-39.78; 3.32)         | 31.29   | 29.56 (24.11-36.6; 2.78)          | 29.16   | 1.08 | 2.62  | 6.85  | 0.04948 |
| <b><i>miRPlus-E1016</i></b> | 211.82 (59.51-588.24; 129.47)     | 164.06  | 133.2 (66.45-258.68; 53.13)       | 115.51  | 1.59 | 2.71  | 7.32  | 0.04245 |
| <i>miRPlus-E1031</i>        | 61.17 (46.76-92.78; 10.9)         | 58.87   | 56.02 (46.02-64.39; 4.98)         | 57.03   | 1.09 | 2.06  | 4.24  | 0.11617 |
| <i>miRPlus-E1033</i>        | 230.39 (120.79-711.48; 116.18)    | 206.21  | 198.75 (101.87-293.61; 54.48)     | 195.39  | 1.16 | 1.19  | 1.41  | 0.37332 |
| <i>miRPlus-E1038</i>        | 193.66 (112.02-328.44; 56.92)     | 201.24  | 154.53 (76.94-258.21; 50.76)      | 142.30  | 1.25 | 2.45  | 6.02  | 0.06511 |
| <i>miRPlus-E1072</i>        | 31.42 (25.79-39.78; 3.83)         | 31.48   | 31.28 (23.16-38.38; 3.47)         | 31.18   | 1.00 | 0.12  | 0.02  | 0.92555 |
| <i>miRPlus-E1077</i>        | 46.66 (41.76-51.82; 2.88)         | 46.93   | 44.81 (38.89-51.88; 3.41)         | 44.21   | 1.04 | 1.94  | 3.75  | 0.14175 |
| <i>miRPlus-E1082</i>        | 35.8 (30.82-42.42; 3.47)          | 35.35   | 36.78 (26.78-46.24; 4.86)         | 35.57   | 0.97 | -0.78 | 0.60  | 0.55262 |
| <i>miRPlus-E1088</i>        | 506.53 (203.98-994.12; 212.32)    | 460.56  | 408.66 (210.03-642.28; 135.89)    | 400.09  | 1.24 | 1.86  | 3.47  | 0.15826 |
| <b><i>miRPlus-E1090</i></b> | 32.32 (28.22-36.94; 2.63)         | 32.32   | 29.29 (22.93-34.94; 2.46)         | 29.00   | 1.10 | 3.89  | 15.11 | 0.00534 |
| <b><i>miRPlus-E1093</i></b> | 47.65 (40.57-60.31; 5.26)         | 47.28   | 43.08 (36.38-52.72; 3.56)         | 42.43   | 1.11 | 3.41  | 11.65 | 0.01321 |
| <b><i>miRPlus-E1097</i></b> | 62.17 (50.41-74.71; 7.28)         | 62.67   | 54.98 (44.8-64.49; 4.73)          | 55.06   | 1.13 | 3.95  | 15.60 | 0.00493 |
| <i>miRPlus-E1098</i>        | 59.69 (46.4-72.94; 6.6)           | 59.60   | 56.58 (47.54-72.05; 5.17)         | 56.74   | 1.05 | 1.77  | 3.12  | 0.18095 |
| <i>miRPlus-E1104</i>        | 89.94 (62.17-129.63; 18.58)       | 90.04   | 78.57 (59.18-95.71; 10.15)        | 77.27   | 1.14 | 2.58  | 6.65  | 0.05089 |

|                      |                               |        |                               |        |      |       |       |         |
|----------------------|-------------------------------|--------|-------------------------------|--------|------|-------|-------|---------|
| <b>miRPlus-E1110</b> | 50.69 (44.01-55.6; 2.84)      | 50.54  | 48.22 (44.61-54.27; 2.39)     | 48.32  | 1.05 | 3.08  | 9.49  | 0.02237 |
| <i>miRPlus-E1117</i> | 207.96 (112.29-483.11; 77.56) | 199.65 | 193.08 (115.93-273.39; 39.39) | 189.64 | 1.08 | 0.82  | 0.68  | 0.52825 |
| <i>miRPlus-E1146</i> | 98.79 (74.47-137.98; 13.12)   | 97.58  | 96.6 (79.66-119.84; 11.12)    | 95.62  | 1.02 | 0.61  | 0.37  | 0.64601 |
| <b>miRPlus-E1151</b> | 96.52 (70.13-118.65; 11.77)   | 96.40  | 81.91 (61.21-110.55; 10.5)    | 80.87  | 1.18 | 4.42  | 19.53 | 0.00165 |
| <i>miRPlus-E1153</i> | 66.12 (54.04-92.8; 9.18)      | 63.00  | 62.09 (47.43-74.82; 7.09)     | 63.01  | 1.06 | 1.66  | 2.74  | 0.20600 |
| <i>miRPlus-E1172</i> | 115.04 (79.41-178.31; 26.47)  | 113.44 | 113.58 (89.69-153.29; 16.65)  | 110.26 | 1.01 | 0.22  | 0.05  | 0.87288 |
| <b>miRPlus-E1175</b> | 42.18 (38.39-47.3; 2.08)      | 41.80  | 39.78 (35.47-43.26; 1.82)     | 39.85  | 1.06 | 3.93  | 15.42 | 0.00493 |
| <i>miRPlus-E1189</i> | 38.5 (31.73-45.99; 3.05)      | 37.95  | 40.27 (33.26-47.32; 3.64)     | 40.66  | 0.96 | -1.74 | 3.04  | 0.18580 |
| <i>miRPlus-E1193</i> | 33.35 (29.85-38.9; 2.55)      | 32.88  | 33.67 (29.01-39.57; 2.56)     | 33.06  | 0.99 | -0.41 | 0.17  | 0.76588 |
| <i>miRPlus-E1200</i> | 55.27 (48.16-64.5; 4.38)      | 54.56  | 56.64 (49.81-65.97; 3.8)      | 56.48  | 0.98 | -1.12 | 1.25  | 0.40033 |
| <b>miRPlus-E1212</b> | 179.82 (143.32-226.27; 20.78) | 183.28 | 155 (120.49-201.19; 17.76)    | 149.44 | 1.16 | 4.34  | 18.84 | 0.00199 |
| <i>miRPlus-E1225</i> | 82.21 (53.02-132.22; 19.25)   | 77.26  | 85.24 (51.95-113.85; 16.38)   | 86.52  | 0.96 | -0.57 | 0.33  | 0.66343 |
| <b>miRPlus-E1232</b> | 59.67 (46.58-74.67; 7.25)     | 60.63  | 51.22 (43.09-58.74; 3.62)     | 51.41  | 1.17 | 4.98  | 24.79 | 0.00061 |
| <i>miRPlus-E1238</i> | 69.17 (55.78-93.1; 9.91)      | 68.87  | 67.73 (49.51-93.7; 10.15)     | 66.05  | 1.02 | 0.48  | 0.23  | 0.71543 |
| <i>miRPlus-E1245</i> | 66.4 (47.35-88.37; 12.79)     | 63.72  | 67.35 (51.4-93.46; 10.66)     | 64.47  | 0.99 | -0.27 | 0.07  | 0.84834 |
| <b>miRPlus-E1247</b> | 98.47 (71.27-183.62; 26.37)   | 91.79  | 80.87 (65.58-92.76; 6.94)     | 80.83  | 1.22 | 3.11  | 9.69  | 0.02144 |
| <b>miRPlus-E1258</b> | 86.75 (56.01-125.13; 20.49)   | 83.05  | 64.07 (48.87-100.32; 11.77)   | 61.78  | 1.35 | 4.61  | 21.22 | 0.00131 |
| <i>miRPlus-E1285</i> | 71.73 (60.83-86.43; 7.24)     | 72.89  | 71.17 (54.83-93.29; 8.2)      | 69.16  | 1.01 | 0.24  | 0.06  | 0.86431 |
| <i>miRPlus-F1004</i> | 43.52 (39.06-47.3; 2.29)      | 43.65  | 43.55 (37.63-46.95; 2.57)     | 44.36  | 1.00 | -0.05 | <0.01 | 0.96857 |
| <b>miRPlus-F1014</b> | 32.91 (29.76-35.43; 1.54)     | 33.07  | 30.75 (28.5-33.5; 1.37)       | 30.61  | 1.07 | 4.54  | 20.59 | 0.00134 |
| <i>miRPlus-F1017</i> | 64.29 (47.23-88.15; 11.28)    | 60.60  | 59.48 (46.37-76.1; 7.79)      | 58.90  | 1.08 | 1.68  | 2.82  | 0.20052 |
| <i>miRPlus-F1023</i> | 49.66 (41.27-56.97; 3.46)     | 49.34  | 48.43 (43.29-63.07; 4.21)     | 47.55  | 1.03 | 1.06  | 1.12  | 0.42721 |
| <i>miRPlus-F1026</i> | 55.93 (40.21-66.98; 6.65)     | 55.13  | 59.96 (47.41-75.05; 6.12)     | 59.64  | 0.93 | -2.12 | 4.49  | 0.10884 |
| <i>miRPlus-F1036</i> | 31.77 (26.2-36.35; 2.29)      | 32.09  | 32.54 (27.73-40.62; 3.46)     | 32.28  | 0.98 | -0.85 | 0.73  | 0.51650 |
| <i>miRPlus-F1041</i> | 49.34 (41.84-58.66; 3.78)     | 49.98  | 46.95 (41.96-55.79; 3.24)     | 46.87  | 1.05 | 2.25  | 5.08  | 0.08941 |
| <b>miRPlus-F1042</b> | 54.62 (41.6-63.68; 5.55)      | 55.80  | 48.89 (36.28-66.54; 7.44)     | 47.99  | 1.12 | 2.92  | 8.54  | 0.02984 |
| <b>miRPlus-F1055</b> | 34.5 (31.21-38.36; 1.99)      | 34.64  | 32.67 (27.17-39.01; 2.49)     | 32.42  | 1.06 | 2.62  | 6.87  | 0.04934 |
| <i>miRPlus-F1058</i> | 47.26 (29.33-109.75; 20.04)   | 41.35  | 60.5 (29.02-107.04; 19.89)    | 62.91  | 0.78 | -2.24 | 5.01  | 0.09028 |
| <i>miRPlus-F1062</i> | 42.89 (34.55-54.46; 3.76)     | 42.45  | 44.28 (34.61-52.26; 4.52)     | 44.92  | 0.97 | -1.12 | 1.25  | 0.40033 |
| <i>miRPlus-F1064</i> | 79.67 (61.15-101.09; 10.28)   | 79.87  | 73.61 (61.88-105.49; 9.23)    | 73.29  | 1.08 | 2.09  | 4.38  | 0.11240 |
| <i>miRPlus-F1066</i> | 89.98 (71.55-118.02; 13.27)   | 90.38  | 82.46 (59.14-117.51; 10.4)    | 83.12  | 1.09 | 2.13  | 4.54  | 0.10696 |
| <i>miRPlus-F1074</i> | 109.08 (44.3-331.61; 70.85)   | 90.41  | 157.57 (48.96-348.08; 75.23)  | 146.70 | 0.69 | -2.24 | 5.01  | 0.09028 |
| <i>miRPlus-F1080</i> | 34.99 (29.44-48.32; 4.37)     | 34.03  | 36.6 (27.78-41.07; 3.08)      | 37.02  | 0.96 | -1.42 | 2.02  | 0.27698 |
| <b>miRPlus-F1086</b> | 45.61 (36.85-53.85; 4.84)     | 46.42  | 41.19 (35.59-52.28; 3.96)     | 39.73  | 1.11 | 3.35  | 11.22 | 0.01474 |
| <i>miRPlus-F1099</i> | 33.55 (29.51-37.58; 2.27)     | 33.69  | 34.49 (29.35-47.64; 3.68)     | 34.26  | 0.97 | -1.01 | 1.02  | 0.44771 |
| <b>miRPlus-F1127</b> | 31.77 (29.01-34.05; 1.36)     | 31.85  | 33.42 (29.02-35.93; 1.7)      | 33.79  | 0.95 | -3.29 | 10.83 | 0.01639 |
| <b>miRPlus-F1130</b> | 66.17 (57.6-71.07; 3.25)      | 66.73  | 63.21 (57.29-73.25; 4.13)     | 62.98  | 1.05 | 2.64  | 6.96  | 0.04823 |
| <i>miRPlus-F1147</i> | 60.23 (43.61-104.06; 15.25)   | 57.18  | 67.1 (47.61-106.71; 15.31)    | 64.76  | 0.90 | -1.52 | 2.30  | 0.24627 |
| <i>miRPlus-F1153</i> | 35.71 (32.2-41.75; 2.28)      | 35.40  | 35.21 (27.49-42.12; 2.68)     | 35.81  | 1.01 | 0.65  | 0.42  | 0.62317 |
| <i>miRPlus-F1154</i> | 53.84 (42.97-63.91; 5.71)     | 54.75  | 58.33 (46.62-97.97; 11.23)    | 56.64  | 0.92 | -1.68 | 2.84  | 0.20052 |
| <i>miRPlus-F1155</i> | 76.22 (69.56-82.32; 4.02)     | 76.50  | 75.76 (69.09-85.05; 3.81)     | 75.84  | 1.01 | 0.39  | 0.16  | 0.77318 |
| <i>miRPlus-F1162</i> | 36.18 (33.3-38.84; 1.8)       | 36.35  | 35.37 (30.49-38.78; 2.22)     | 35.64  | 1.02 | 1.28  | 1.65  | 0.33125 |
| <b>miRPlus-F1163</b> | 53.26 (43.58-60.3; 3.73)      | 53.88  | 49.84 (41.88-54.29; 2.67)     | 50.28  | 1.07 | 3.50  | 12.27 | 0.01097 |

|                                |                                   |         |                                   |         |      |       |       |         |
|--------------------------------|-----------------------------------|---------|-----------------------------------|---------|------|-------|-------|---------|
| <i>miRPlus-F1180</i>           | 66.81 (54.5-77.16; 5.34)          | 67.31   | 63.62 (55.24-85.92; 6.23)         | 61.73   | 1.05 | 1.84  | 3.40  | 0.16209 |
| <i>miRPlus-F1181</i>           | 109.76 (27.38-244.94; 72.38)      | 82.77   | 114.76 (17.2-238.22; 50.85)       | 116.57  | 0.96 | -0.27 | 0.07  | 0.84834 |
| <i>miRPlus-F1185</i>           | 33.45 (27.92-56.18; 5.94)         | 32.98   | 36.02 (28.71-51.89; 5.08)         | 35.43   | 0.93 | -1.56 | 2.43  | 0.23636 |
| <i>miRPlus-F1193</i>           | 38.22 (35.15-42.3; 1.94)          | 38.11   | 38.08 (31.78-41.19; 2.38)         | 38.58   | 1.00 | 0.21  | 0.04  | 0.88123 |
| <i>miRPlus-F1194</i>           | 60.03 (43.45-83.11; 8.28)         | 59.00   | 60.82 (48.24-93.75; 10.95)        | 58.35   | 0.99 | -0.27 | 0.07  | 0.84834 |
| <i>miRPlus-F1195</i>           | 39.76 (27.64-71.41; 9.83)         | 37.22   | 40.08 (23.79-51.7; 6.99)          | 40.22   | 0.99 | -0.13 | 0.02  | 0.92430 |
| <i>miRPlus-F1206</i>           | 52.22 (45.67-57.2; 2.93)          | 52.06   | 51.26 (44.73-59.86; 3.26)         | 50.93   | 1.02 | 1.02  | 1.04  | 0.44675 |
| <i>miRPlus-F1210</i>           | 34.02 (29.24-36.59; 1.69)         | 34.12   | 32.74 (28.43-38.49; 2.2)          | 32.70   | 1.04 | 2.08  | 4.33  | 0.11428 |
| <i>miRPlus-F1215</i>           | 55.17 (48.09-61.47; 2.91)         | 55.03   | 54.88 (50.41-66.58; 4.38)         | 53.43   | 1.01 | 0.26  | 0.07  | 0.85898 |
| <i>miRPlus-F1221</i>           | 31.98 (28.13-35; 1.64)            | 31.69   | 32.11 (28.36-37.62; 1.91)         | 32.31   | 1.00 | -0.23 | 0.05  | 0.87288 |
| <i>miRPlus-F1225</i>           | 73.08 (55.15-98.41; 11.12)        | 73.37   | 69.36 (51.15-98.47; 9.11)         | 68.24   | 1.05 | 1.24  | 1.53  | 0.34983 |
| <i>miRPlus-F1237</i>           | 49.5 (39.3-58.82; 4.85)           | 48.25   | 45.71 (39.76-59.83; 4.93)         | 45.10   | 1.08 | 2.59  | 6.71  | 0.05024 |
| <i>miRPlus-G1246-3p</i>        | 32.14 (25.96-51.49; 5.91)         | 30.30   | 34.97 (28.04-41.33; 4.22)         | 35.30   | 0.92 | -1.85 | 3.43  | 0.16082 |
| <b>Non-microRNA small RNAs</b> |                                   |         |                                   |         |      |       |       |         |
| 5S rRNA                        | 2563.2 (1267.99-4282.75; 863.32)  | 2582.97 | 2422.39 (1101.1-4155.69; 905)     | 2233.34 | 1.06 | 0.54  | 0.29  | 0.68737 |
| <b>RNU1</b>                    | 1115.03 (723.8-1647.81; 247.94)   | 1079.05 | 874.65 (558.88-1322.21; 202.21)   | 891.35  | 1.27 | 3.60  | 12.93 | 0.00900 |
| <b>RNU5</b>                    | 750.37 (312.69-1551.95; 310.9)    | 707.52  | 521.01 (287.79-721.19; 111.97)    | 487.70  | 1.44 | 3.34  | 11.19 | 0.01474 |
| <b>RNU6-1</b>                  | 552.41 (200.64-957.1; 184.89)     | 524.22  | 390.61 (158.38-711.13; 118.08)    | 398.52  | 1.41 | 3.54  | 12.52 | 0.01011 |
| <b>RNU6-1/RNU6-2</b>           | 4037.13 (1555.19-7285.9; 1552.97) | 3512.91 | 2878.75 (1296.67-4590.25; 896.93) | 2817.61 | 1.40 | 3.10  | 9.63  | 0.02172 |
| SNORD10                        | 395.28 (201.26-583.26; 106.43)    | 408.93  | 332.8 (202.68-439.39; 64.76)      | 331.16  | 1.19 | 2.41  | 5.80  | 0.07019 |
| SNORD118                       | 56.72 (37.59-110.16; 15.89)       | 53.12   | 49.08 (40.27-58.44; 6.02)         | 48.99   | 1.16 | 2.16  | 4.67  | 0.10175 |
| SNORD12                        | 36.67 (25.04-53.65; 6.86)         | 36.13   | 33.13 (23.36-40.5; 4.06)          | 33.81   | 1.11 | 2.12  | 4.48  | 0.10884 |
| <b>SNORD13</b>                 | 513.58 (251.4-958.23; 204.28)     | 513.76  | 384.05 (200.06-539.05; 88.93)     | 389.30  | 1.34 | 2.80  | 7.83  | 0.03604 |
| SNORD14B                       | 36.56 (30.13-44.46; 3.44)         | 35.94   | 34.79 (28.86-48.19; 4.46)         | 34.03   | 1.05 | 1.47  | 2.17  | 0.26306 |
| <b>SNORD2</b>                  | 277.69 (116.93-839.63; 156.92)    | 232.73  | 185.25 (122.98-252.06; 36.39)     | 189.34  | 1.50 | 2.77  | 7.67  | 0.03759 |
| <b>SNORD3@</b>                 | 602.26 (185.1-1339.42; 261.49)    | 573.19  | 415.53 (208.38-666.89; 104.4)     | 420.78  | 1.45 | 3.19  | 10.20 | 0.01896 |
| SNORD38B                       | 146.23 (74.81-330.15; 61.25)      | 141.87  | 116.07 (72.68-153.78; 20.48)      | 118.06  | 1.26 | 2.25  | 5.07  | 0.08952 |
| <b>SNORD44</b>                 | 132.65 (50.95-329.62; 65.03)      | 109.98  | 91.02 (61.4-127.72; 17.84)        | 91.17   | 1.46 | 2.98  | 8.87  | 0.02689 |
| SNORD48                        | 742.63 (272.3-1863.18; 364.75)    | 694.18  | 545.86 (290.51-801.48; 109.44)    | 550.54  | 1.36 | 2.49  | 6.21  | 0.06005 |
| SNORD49A                       | 109 (48.36-321.28; 56.01)         | 100.26  | 90.83 (66.53-125.57; 16.98)       | 86.58   | 1.20 | 1.50  | 2.24  | 0.25280 |
| SNORD4A                        | 112.29 (57.74-270.85; 49.75)      | 101.91  | 93.26 (50.88-130.23; 17.88)       | 97.18   | 1.20 | 1.73  | 3.01  | 0.18659 |
| SNORD6                         | 402.48 (150.99-872.54; 184.71)    | 381.96  | 334.08 (183.12-445.09; 70.67)     | 350.08  | 1.20 | 1.67  | 2.78  | 0.20322 |
| SNORD65                        | 702.76 (285.64-1351.94; 251.77)   | 716.24  | 593.72 (287.84-978.6; 190.64)     | 580.88  | 1.18 | 1.65  | 2.74  | 0.20600 |
| SNORD68                        | 128.87 (55.47-256.89; 49.39)      | 117.59  | 111.65 (66.48-160.16; 21.63)      | 112.32  | 1.15 | 1.54  | 2.36  | 0.24108 |

<sup>a</sup>RNAs are listed alphanumerically. Some probes recognize multiple species of RNAs and members of such sets of RNAs are listed together. Fold-change values are ratios of mean values for the case and control cohorts. Adjusted P values, calculated from moderated t-statistics, are q-values and indicate false discovery rates with the Benjamini-Hochberg method. Moderated t- and F-statistics were calculated using the limma Bioconductor package in R. RNAs differentially expressed between the case and control cohorts (adjusted P <0.05) are shown in bold.
